# Supplementary material
Source: PubMed Central journal article supplement (PMC1691322)
Supplement: 12803902s01.pdf [file 12803902s01.pdf]

This is an electronic appendix to the paper by Swain and Taylor 2003. Structural rRNA characters support monophyly of raptorial limbs and paraphyly of limb specialization in water fleas. *Proc. R. Soc. Lond. B* **270**, 887—896. (DOI 10.1098/rspb.2002.2297.)

Electronic appendices are refereed with the text. However, no attempt has been made to impose a uniform editorial style on the electronic appendices.

Electronic Appendix A

Table 1

Orders, Families, Genera, Species and sampling location of taxa included in this study.

| Order        | Family            | Genus and Species                | Sampling location                               |
|--------------|-------------------|----------------------------------|-------------------------------------------------|
| Anostraca    | Artemiidae        | <i>Artemia franciscana</i>       | Transcience coporation, Maryland                |
|              | Polyartemiidae    | <i>Polyartemiella hazeni</i>     | Teller, Alaska                                  |
|              | Streptocephalidae | <i>Streptocephalus dorotheae</i> | Triops Educational Science Inc., Florida        |
|              | Chirocephalidae   | <i>Eubbranchipus neglectus</i>   | Windsor, Ontario, Canada                        |
|              | Branchinectidae   | <i>Branchinecta paludosa</i>     | Bathurst Island, Nunavut, Canada                |
| Notostraca   | Triopsidae        | <i>Lepidurus acticus</i>         | Igloodik, Nunavit, Canada                       |
|              | Triopsidae        | <i>Triops longicaudatus</i>      | Triops Educational Science Inc., Florida        |
| Laevicaudata | Lynceidae         | <i>Lynceus brachyurum</i>        | Cow Creek, North Dakota                         |
| Spinicaudata | Limnadiidae       | <i>Limnadia</i> sp.              | Mount Hampton, Western Australia, Australia     |
|              | Cyclestheriidae   | <i>Cyclestheria hislopi</i>      | Karumba, Queensland, Australia                  |
|              | Caenestheriidae   | <i>Caenestheriella setosa</i>    | Zap, North Dakota                               |
| Haplopoda    | Leptodoridae      | <i>Leptodora kindti</i>          | Douglas Lake, Michigan                          |
| Onychopoda   | Cercopagidae      | <i>Bythotrephes longimanus</i>   | Postsee, Germany                                |
|              | Cercopagidae      | <i>Cercopagis pengoi</i>         | Lake Ontario, 4-Mile Creek State Park, New York |
|              | Podonidae         | <i>Evadne nordmanni</i>          | Grantley Harbor, Teller, Alaska                 |
|              | Podonidae         | <i>Podon leuckarti</i>           | Grantley Harbor, Teller, Alaska                 |
|              | Polyphemidae      | <i>Polyphemus pediculus</i>      | Wild Goose Lake, Michigan                       |
| Ctenopoda    | Holopediidae      | <i>Holopedium amazonicum</i>     | Flying Pond, Maine                              |
|              | Sididae           | <i>Sida crystallina</i>          | Wild Goose Lake, Michigan                       |
|              | Sididae           | <i>Diaphanosoma</i> sp.          | North Dike, South Carolina                      |
|              | Sididae           | <i>Latonopsis occidentalis</i>   | Chicot Lake, Louisiana                          |
| Anomopoda    | Daphniidae        | <i>Ceriodaphnia rotunda</i>      | Greeleyville, South Carolina                    |
|              | Daphniidae        | <i>Daphnia ambigua</i>           | Tucker Pond, Rhode Island                       |
|              | Daphniidae        | <i>Daphnia dentifera</i>         | Deep Lake, Mendon Park, New York                |
|              | Daphniidae        | <i>Daphnia longicephala</i>      | Fleurieu Peninsula, South Australia, Australia  |
|              | Daphniidae        | <i>Daphnia magna</i>             | Crescent Lake, Nebraska                         |
|              | Daphniidae        | <i>Daphnia occidentalis</i>      | Northern, Western Australia, Australia          |
|              | Daphniidae        | <i>Daphnia pulicaria</i>         | Java Lake, New York                             |
|              | Daphniidae        | <i>Daphniopsis ephemeralis</i>   | Long Point, Ontario, Canada                     |
|              | Daphniidae        | <i>Daphniopsis truncata</i>      | Perth, Western Australia, Australia             |
|              | Daphniidae        | <i>Scapholeberis rammneri</i>    | Ann Arbor, Michigan                             |
|              | Daphniidae        | <i>Simocephalus serrulatus</i>   | First Sister Lake, Michigan                     |
|              | Moinidae          | <i>Moina affinis</i>             | Valle Santiago, Mexico                          |
|              | Macrothricidae    | <i>Ofyoxus gracilis</i>          | Raven Lake, Ontario, Canada                     |

**Table 2**  
**Genbank accession numbers of sequences used in this study**

| Taxa                            | 18S V4                | 18S V7                | 28S V1-V3             | 28S V5-V7             |
|---------------------------------|-----------------------|-----------------------|-----------------------|-----------------------|
| <i>Artemia franciscana</i>      | -                     | -                     | -                     | AY137143              |
| <i>Polyartemiella hazeni</i>    | -                     | -                     | -                     | AY137140              |
| <i>Streptocephalus dorothae</i> | -                     | -                     | -                     | AY137142              |
| <i>Eubbranchipus neglectus</i>  | -                     | -                     | -                     | AY137139              |
| <i>Branchinecta paludosa</i>    | -                     | -                     | -                     | AY137141              |
| <i>Lepidurus acticus</i>        | -                     | -                     | -                     | AY137138              |
| <i>Triops longicaudatus</i>     | -                     | -                     | -                     | AY137137              |
| <i>Lynceus brachyurum</i>       | -                     | -                     | -                     | AY137136              |
| <i>Limnadia</i> sp.             | AF070114 <sup>†</sup> | AF070509 <sup>†</sup> | AF532886 <sup>‡</sup> | AY137135              |
| <i>Cyclestheria hislopi</i>     | AF070098 <sup>†</sup> | AF070492 <sup>†</sup> | AF532878 <sup>‡</sup> | AY137133              |
| <i>Caenestheriella setosa</i>   | AF070095 <sup>†</sup> | AF070489 <sup>†</sup> | AF532879 <sup>‡</sup> | AY137134              |
| <i>Leptodora kindti</i>         | AF070113 <sup>†</sup> | AF070508 <sup>†</sup> | AF532877 <sup>‡</sup> | AY137130              |
| <i>Bythotrephes longimanus</i>  | AF070094 <sup>†</sup> | AF070488 <sup>†</sup> | AF532876 <sup>‡</sup> | AY137131              |
| <i>Cercopagis pengoi</i>        | AY137172-75*          | AY137184-87*          | AF532902              | AY137132              |
| <i>Evadne nordmanni</i>         | AF532896              | AF532900              | AF532903-06*          | AY13716-67*           |
| <i>Podon leuckarti</i>          | AF532895              | AY137188-91*          | AF532901              | AY137144-47*          |
| <i>Polyphemus pediculus</i>     | AF070119 <sup>†</sup> | AF070514 <sup>†</sup> | AF532875 <sup>‡</sup> | AY137148-51*          |
| <i>Holopedium amazonicum</i>    | AF070110 <sup>†</sup> | AF070504 <sup>†</sup> | AF532874 <sup>‡</sup> | AY137129              |
| <i>Sida crystallina</i>         | AF070121 <sup>†</sup> | AF070516 <sup>†</sup> | AF532873 <sup>‡</sup> | AY137128              |
| <i>Diaphanosoma</i> sp.         | AY137176-78*          | AY137192-95*          | AF532907-10*          | AY137152-55*          |
| <i>Latonopsis occidentalis</i>  | AF532897              | AY137180-83*          | AY137168-71*          | AY137127              |
| <i>Ceriodaphnia rotunda</i>     | AF532893              | AF532898              | AF346520 <sup>£</sup> | AF346520 <sup>£</sup> |
| <i>Daphnia ambigua</i>          | -                     | -                     | -                     | AF346513 <sup>£</sup> |
| <i>Daphnia dentifera</i>        | -                     | -                     | -                     | AF346511 <sup>£</sup> |
| <i>Daphnia longicephala</i>     | -                     | -                     | -                     | AF346516 <sup>£</sup> |
| <i>Daphnia magna</i>            | AF070104 <sup>†</sup> | AF070499 <sup>†</sup> | AF532883 <sup>‡</sup> | AF346515 <sup>£</sup> |
| <i>Daphnia occidentalis</i>     | -                     | -                     | -                     | AF346510 <sup>£</sup> |
| <i>Daphnia pulicaria</i>        | -                     | -                     | -                     | AF346514 <sup>£</sup> |
| <i>Daphniopsis ephemeralis</i>  | AF070100 <sup>†</sup> | AF070495 <sup>†</sup> | AF532884 <sup>‡</sup> | AF346518 <sup>£</sup> |
| <i>Daphniopsis truncata</i>     | AF070107 <sup>†</sup> | AF070501 <sup>†</sup> | AF532885 <sup>‡</sup> | AF346517 <sup>£</sup> |
| <i>Scapholeberis rammneri</i>   | AF070120 <sup>†</sup> | AF070515 <sup>†</sup> | AF532880 <sup>‡</sup> | AY137126              |
| <i>Simocephalus serrulatus</i>  | AF532894              | AF532899              | AF346520 <sup>£</sup> | AF346520 <sup>£</sup> |
| <i>Moina affinis</i>            | AF070116 <sup>†</sup> | AF070511 <sup>†</sup> | AF532882 <sup>‡</sup> | AY137156-59*          |
| <i>Ofryoxus gracilis</i>        | AF070117 <sup>†</sup> | AF070512 <sup>†</sup> | AF532881 <sup>‡</sup> | AY137160-63*          |

<sup>†</sup> From Crease and Taylor, 1998

<sup>‡</sup> From Taylor *et al.*, 1999

<sup>£</sup> From Omilian and Taylor, 2001

\* These sequences are from cloned PCR products

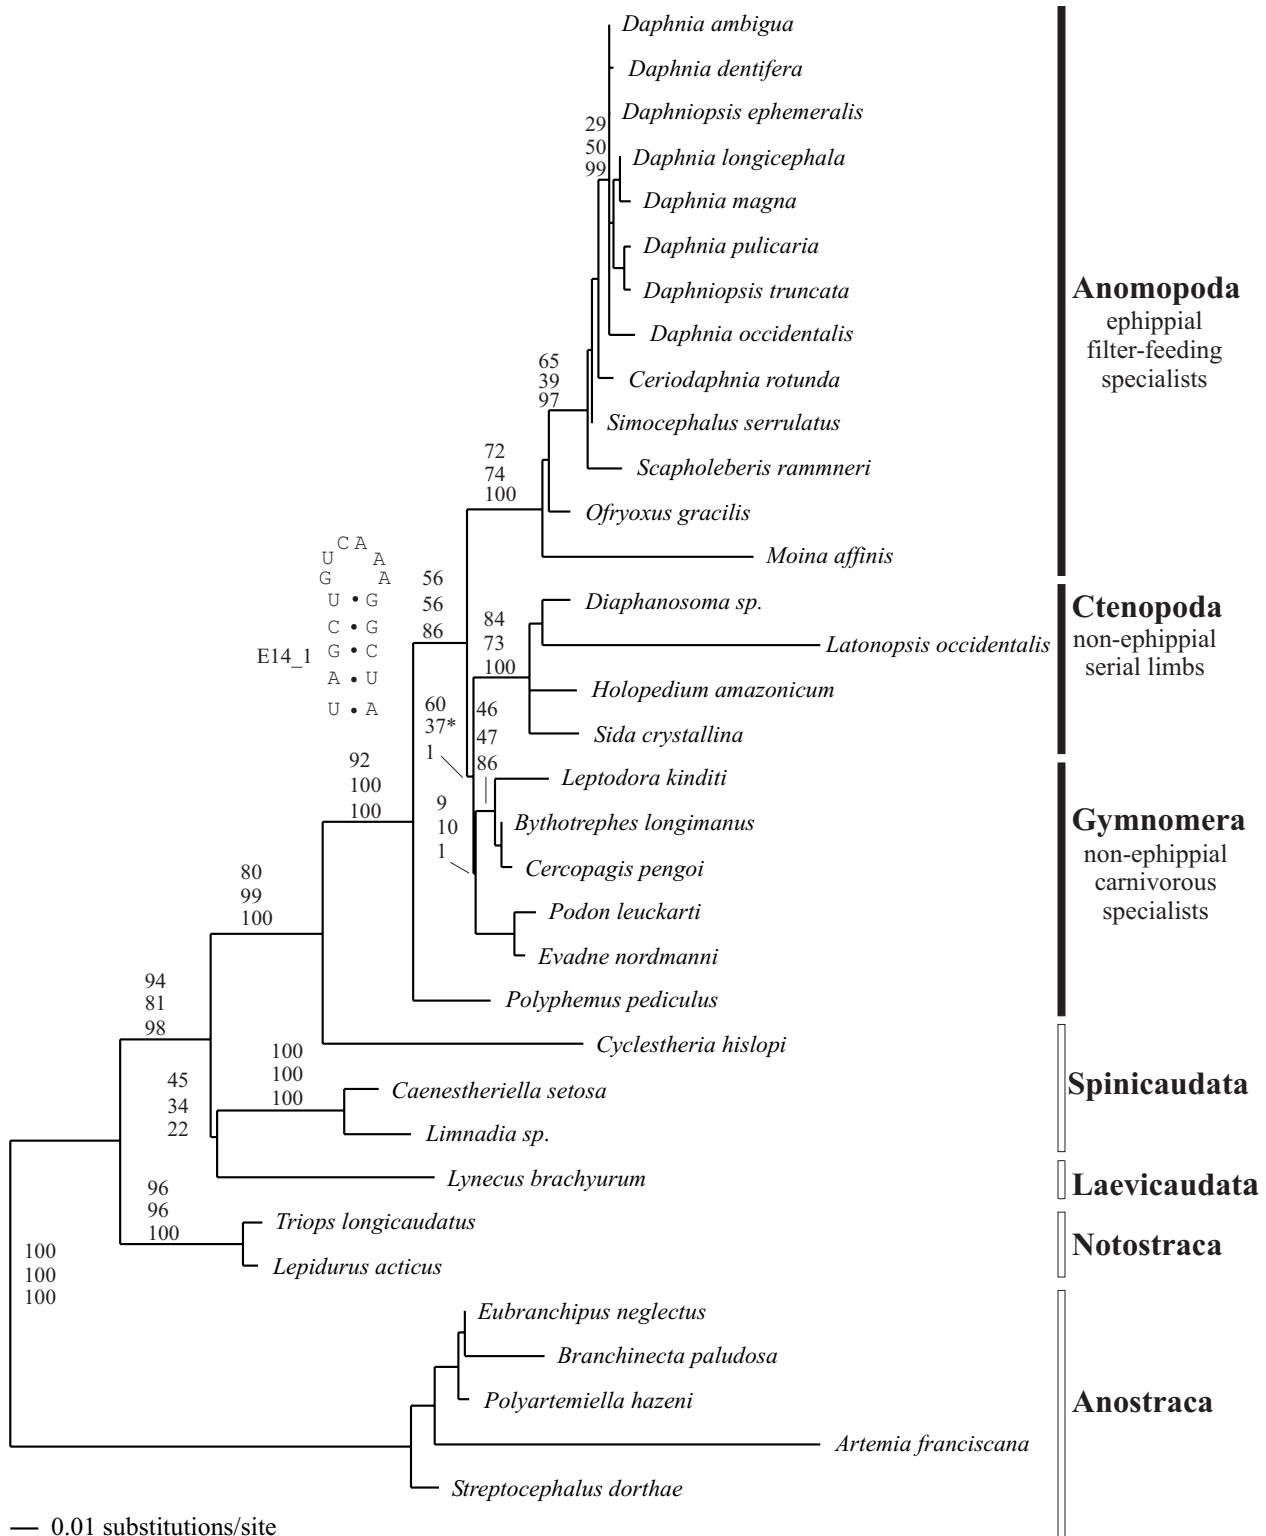

**Figure 6:** NJ tree showing the branchiopod relationships for all 35 taxa based on the V5-V7 28S rDNA sequences. Support values are listed vertically from top to bottom: ME (1,000 iteration minimum-evolution using maximum-likelihood DNA distance), MP (1,000 iteration maximum-parsimony using gaps as a fifth character state), and Bayesian.

#NEXUS

[total rRDNA nucleotide data]

Begin DATA;

Dimensions ntax=21 nchar=3531;  
Format datatype=NUCLEOTIDE gap=-;

Matrix

Daphnia magna

TTTAAACGAGGAACCATTTGGAGGGCAAGTCTGGTGCCAGCAGCCGCGGTAACCTCCAGCTCCAATAGCGTATATTTAAAGTTGTT  
GCGGTTAAAAAGCTCGTAGTCGGATGTCTGTCTTCGGCCGGGCGGCCCGCTC--TGAATCAAGGGTGTTCGCT-  
TTCACGCTCTGGGAGCCCGGTGTCAAAG-  
CCCAGCTCTCTTCACGGTCGGACAACATCGCCGAGTGGTGGCCGGTGGGTTCGCGTTGTATCGGTTTCGCTGGCGTTTCGTT  
TTCTTCCCTCTTCGGG-GTT-----CGCTCCGT-----  
---CGAGGGGGGGATGATCGC--TCGCGTTCAGTTGACGCGGTTTCGCTCCACCCA--  
GTCAATCGTTCGGGGTGCCTTTCACCGGGTGTCTCGGGCGGCCGCAACGTTT-  
ACTTTGAACAAATTAGAGTGTCAAAGCAGGT-GTA-  
TCCCAACGCCTGAATATCGCAGCATGGAATGATGGAATAGGACCTCGGTCCGATTTTGCTGGTCTTTTCTT---  
TTGGACCCGAGGTAA--X--  
CTCTTTCTTGATTTCGGTGGGTGGTGGTGCATGGCCGTTCTTAGTTGGTGGAGCGATTTGTCTGGTTAATTCGGATAACGAAC  
GAGACTTAGCCTGTAAATAGGTGACGGGTTT-TATCAATTGAAA-----  
CCGAAGGGAGTACGGAGGCGTCGGGATCAGGTGGCG-GCGGTTTCGGGTGG-AAGGGGCCGGGTT-CTTTAGCG-  
GGCTCTTTTCGCG-----GCGTGGATTTCGGTTGGAAGCAAAGAGGAAGGGCGA-GTTGGTG-  
TTCGGGGTTTCGGCTCCGGGCGTTGGCTTTTCTTTT-CTTGCCTTTCCTGCC---GGGCTGCGTC-----  
GCGAGGGGGTTTTCGGGGGCTCGGTCTTTGTTTCTCGGTCGTCGTC-  
ATCCCCGGCGATACTTCTGCTCTCGCTCCGTCACGC----  
AGTCTTCTTAGAGGGACAAGCGGCTCCAGCCGCTGACAGTGAGCAATAACAGGTCTGTGATGCCCTTAGATGTCTGGGC  
CGCACGCGCGTACACTGAAGGAATCAGCGTGTTCCTCTCCCTGTCCGAAAGGACCGGGTA--XX--  
GTAAGCGGAGGAAAAGAACTAACAAGGATTCCTTAGTAGCGGCAGCGAACAGGGATGAGCCAGCACCCGAACCTCGC--  
--GCCCGGTTGAGCGGGTCCGAGGAATGTGGTGTTCGGGAGGATCGTGCAGCGCTGTCCGGTA-  
TATATCGTCCAAGTCTCCATGAACGGGGCGAGCAACCCACAGAGGGTGTGACGCCCCGTAGCTT-  
AGACGAGCCGAGACCGTGCATCGGATCCCTT---  
CCCAAGAGTTCGGGTTGCTTGAGCGTGCAGCCCTAAGCGGGAGGTAACCTCTTCTAAGGCTAAATATCGCCACGAGACCGAT  
AGCGAACAAGTACCGCGAGGGAAAGTTGAAAAGAAGTTTGAAGAGAGAGTTCAAGAGTGCCTGAAACCGTTTCAGGGGGTTAA  
ACGGGTGGGCCCTCGAAGGTCGAACGAG-CCCCCGCTCCCGGCAC-TTGGTTGCATGCCCTCTGCTG--CGAA-GAG--  
ACCGAC-TTGATTTGGCGGCT-----CTGTTTCG-TTGGCG-AGGACCGCATTAGCCGCGCCA--  
AGGTCGCAAGTGGGGGG--CCTAGTAGGACTCCGCGACCGACTGGGTGT-----  
CTGTTATACGGGGCG-TTCGTTAGCG----AGTTT----TGGGTTA-----CCTCGTGTGCCCTCGACGAGCGC-  
GGCGT-----CACTCAACAGTACT-GCCCGGTGCTGACCTGTCTCCTCCCGGATTG-TCTACGT-  
GTATCTCGCTAGAGGCTTCGATCT-----GGAGCTT-  
CAGGGCTTGGCATCACGTTGTAGAAAACCGCGGAGGCCAGAGCGGAGAGTAGAA--  
GTCGGGTCCCACCCGACCCGTTGAAACACGGACCAAGGAGTCTAACATGTGCGCGAGTTCGTCGAGTCTAT-  
TACGAAACTCGCGA-GGCGCAATGAAAGTGAAGCG---GCC---CCGATGAGGG----TGCAAT-CCG-  
CGAGGGGTGATCCCGTCT--CG-----AACAGAGCGGGCGCAACCCCTGGGCGTCCGAATGCTCGCGAGGCC---  
CCGGTCAAACGGTGTG-----  
CCGAGTCGGCCGGACGAACCAAGAGCGTACACGTTGGGACCCGAAAGATGGTGCCTATGCCTGGCCAGGACGAAGCCAGGG  
GAAACCCGTGGAGGTCGCGAGCGATCTGACGTGCAAATCGATCGTTCGGAGTTGGGTATAGGGGCGAAAGACTAATCGAA  
CCATCTAGTAGC--XXX--TGCCCTATACCGCGGCCGTCGGTTCGGCAGTGCGA---  
ATAACGTCCGTGTGAGTTCGAGTTCGAGAGAGCGACGGCGCTGAGCCCCGACGAGTAGGGGGTTCGCGACGGTGTGAGCGTTGAAGGG  
TTGTGGGCGTGTAGCCTGCCTGGAGCCGCGCTCGGTGCGAGATCTTGGTGGTAGTAGCAAATACTCCAGAGGGATCCTGGAGGA  
CTGACGCGGAGAAGGGTTTCATGTGAACAGTGGTTGGACATGAGTCACTGATCCCTAAGCCGCGAGGCGAAAGCCGGCCTAGT  
G-ACGGGCGTGTGCTAGTG-----TGCTCTTTTCTTTTTCGGGAGG-----ATTTCGGCGCG-  
CGCTTCTTTCCCTCTTTTCG-----TTTCTATAGTCCCTAGCCAGATGGGTGAAAGG-----  
-----AAAGAAAGGAGAGTTGTGTGT-----TTGTTGAAA-----  
-----AGAACCGAAGAAAAAATCATGCGAAACTGAAACG--  
TGAGACGCCAC-CAAGGTT-AAGGCGAAAGGGATCCGGTCTGATTCGGAACCGGGTTCGCGCTACGTCGCGCA-----  
TAAAACGACTT--CAACCCTCGTAATG-----  
TCACGGTTCGCGGTAACGCGACACAAACCGGAGAAGCTGCCGAGAACCCCGGAAGAGTTTCTTTTCTGCTTGAGGGACCGA

GACCTGGAATCCCCTCGCGGGGCGAGAGGGTTATGGAT--TTA-GCTGTCAA--  
AGGCTATCCCGAAGAGCGTTCGCGTTTCTGCGACGTCCGTGGTTCGTTCTCGGCTGGCCCTTGAAAATCCGGCGG--  
AGGGTTA-----CGTTGTT-GG-----  
ACGTTTCGCGCCCCTCGTACCGATATCCGCATCAGGTCTCCAAGGTGAACAGCCTCTAGTCGATGGATGAATGTGGGTAA  
Daphniopsis\_ephemeralis  
TTTAACGAGGAACCATTTGGAGGGCAAGTCTGGTGCCAGCAGCCGCGGTAACCTCCAGCTCCAATAGCGTATATTTAAAGTTGTT  
GCGGTTAAAAAGCTCGTAGTCGGATGTCTGTCTTCGGCCGGGCGGCCACTC--TGAATCAAGGGTGTTCGCT-  
TTCACGCTCTGGGAGCCCCGGGTGTCAAAG-  
CCCGACTCTCTTACGGTTCGACAAACATCGCCGGAGTGGTGGTTCGGTGGGTTCGGTTGTATCGGTTTCGTACAA-----G--  
-----CGGCTTYGCG-GT-----CGTTT-----  
-----G-----TGCCTTCAGTTGACTCGATTCGCTCCACCCA--  
GTCAATCGTTTCGGGGTGCCTTTCACCGGGTGTCTCGGGCGGCCGCAACGTTT-  
ACTTTGAACAAATTAGAGTGTCTCAAAGCAGGT-GTA-  
TCCCAACGCCTGAATATCGCAGCATGGAATGATGGAATAGGACCTCGGTCCGATTTTGTCTGGTCTTTTCTT---  
TTGGACCCGAGGTAA--X--  
CTCTTTCTTGATTTCGGTGGGTGGTGGTGCATGGCCGTTCTTAGTTGGTGGAGCGATTTGTCTGGTTAATTCGGATAACGAAC  
GAGACTTAGCCTGCTAAATAGGTGACGGGTTT-TATCAATTGAAA-----  
CCGAAGGGAGTACGGAGGCGTCGGGATCAGGTGGCG-GCGGTTTCGGGTTGCAAGTGGCCGGGTT-CTTTAGTG-  
AGCTCTGTT-----GGCTTTGTTTACGGGCTGCCTCG---GGCGT-  
GCGGGCGACTCGTCTTTCTGACGTTGTTGGTGGTTTTAGTTTG-C--A-----C-----GGTCTGCG-----  
-----G-GGTTTTCGGGGGCTCGGTCTCTTGTCTTCGGTTCGTCGTC-  
ATCCCAGCGGATACCTTCTGCTCTCGCTCCGTCACGC----  
AGTCTTCTTAGAGGGACAAGCGGCTCCAGCCGCGTGACAGTGAGCAATAACAGGTCTGTGATGCCCTTAGATGTCTGGGC  
CGCACGCGCGTACACTGAAGGAATCAGCGTGTTCCTACTCTCCCTGTCCGAAAGGACCGGGTA--XX--  
GTAAGCGGAGGAAAAGAACTAACAAGGATTCCTTAGTAGCGGCGAGCGAACAGGGATGAGCCCAGCACCCGAACCTCGC--  
--GCCCGGTTAAGCGGGTGCAGGAAATGTTGGTGTTCGGGAGGATCGTGCAGCGCTGTCCGGTA-  
TTTATCGTCCAAGTCTCCATGAACGGGGCGAGCAACCCATAGAGGGTGTGAGCCCGTAGCTT-  
AGACGAGCCGAGACCGTGCATCGGATCCCTT---  
CCCAAGAGTTCGGTTGCTTGAGCGTGCAGCCCTAAGCGGGAGGTAAACTCCTTCTAAGGCTAAATATCGCCACGAGACCGAT  
AGCGAACAAGTACCAGGAGGAAAGTTGAAAAGAACTTTGAAGAGAGAGTTCAAGAGTGCCTGAAACCGTTTCAGGGGGTTAA  
ACGGGTGGGCCCTCGAAGGTGCAACGAG-CCCCGCTCCCGGCAC-TTGGTTGCATGCCCTCTGCTG--CGAA-GAG--  
ACCGAC-TTGATTTGGCGGCT-----CTGTTTCG-TTGGCG-AGGACCGCATTAGCCGCGCCA--  
AGGTCCGCTAGTGGGGG--CCTAGTAGGACTCCGCGACCGACTGGGTGT-----  
CTGTTATACGGGGCG-TTTGTTAGCG---AGTCT---TGGGTTA-----  
CCTTGTGTGCCCTCGACGAGCGCAGGCGT-----CACTCAACAGTACT-GCCCGGTTCGTGACCTGTCTCCTCCCGGG--  
-----AGGT-TTTTTGTGCTCGAA-----AGAGTCA-CAGAGACTG-----  
AACCTGTGGAGGCCAGAGCGGAGAGTAGAA--  
GTCGGGTCCCACCCGACCGTCTTGAAACACGGACCAAGGAGTCTAACATGTGCGCAAGTCGTGAGTCTAT-  
TACGAACTCGCGA-GGCGCAATGAAAGTGAAGCG---GCC---CCGATGAGGG----TGCAT-CCG-  
CGAGGGGTGATCCCGTCT--CG-----AACAGAGCGGGCGCAACCCCTGGGCGTCCGAATGCTCGCGAGACC---  
CCCGTCAAACGGGGT-----  
CGAGTCCGCCGGACGAACCCAGAGCGCACACGTTGGGACCCGAAAGATGGTGACCTATGCCCTGGCCAGGACGAAGCCAGGGG  
AAACCTTGGTGGAGGTCCGCAGCGATTCTGACGTGCAAAATCGATCGTTCGGAGTTGGGTATAGGGGCGAAAGACTAATCGAAC  
CATCTAGTAGC--XXX--TGCTTATACCGGGCCGTCGGTTCGGCAGAGCGA---  
ATAACGTCCTGTGTCAGCTCGAAGAGAGCGACGGCGCTGAGGCCCCGACGAGTAGGGGGTTCGCGACGGTGTGAGCGTTGAAGGG  
TTGTGGGCGTGAGCTGCCCGGAGCCCGCTCGGTGCAGATCTTGGTGGTAGTAGCAAATACTCCAGAGGGATCCTGGAGGA  
CTGACGCGGAGAAGGGTTTCATGTGAACAGTGGTTGGACATGAGTCAGTCGATCCTAAGCCGAGGCGAAAGCCGACCTAGT  
G-ACGGGCGTGATGCAAGTG-----TGGACTGTTT-----TTTGAGA-----  
-----A-----  
-----A-----  
-----AGAACTGAAACATTAACA-----AAACG--TGAGACGCCAC-  
CCAGGTT-AAGGCGAAAGGGAATCCGGTCCGTATCCGGAACCGGGCTGCGGCTACGTCCGCGA-----TAAACGACCT--  
CAACCTCGTAATG-----  
TCACGGTTCGGGTAACGCGACACAAACCGGAGAAGCTGCCGAGAACCCCGGGAAGAGTTTTCTTTTCTGCTTGGAGGGACCGA  
GACCTGGAATCCCCTCGCGGGGCGAGAGGGTTACGGAT--TTA-GCTGTCAA--  
AGGCTATCCCGAAGAGCGTTCGCGTTTCTGCGACGTCCGTGGTTCGTTCTCGGCTGGCCCTTGAAAATCCGGTGGG-

AGGGTTA-----CGTTGTT-GG-----  
ACGTTTCGCGCCCCTCGTACCGATATCCGCATCAGGTCTCCAAGGTGAACAGCCTCTAGTCGATGGATGAATGTGGGTAA  
Daphniopsis\_truncata  
TTTAACGAGGAACCATTTGGAGGGCAAGTCTGGTGCCAGCAGCCGCGGTAACCTCCAGCTCCAATAGCGTATATTAAGTTGTT  
GCGGTTAAAAAGCTCGTAGTCGGATGTCTGTCTTCGGCCGGGCGGCGCCACTC--TGAATCAAGGGTGTTCGCT-  
TTCACGCTCTGGGAGCCCCGGGTGTCAAAG-  
CCCCACTCTCTTTACGGTCGGACAACATCGCCGGAGTGGTGGTTCGGTGGGTCGCGTTGTATCGGTTTCGCGGACTTTTCGGTTT  
TTTTTCCATCGAGTGTGTCTTTTCTCTTCCTCGTTTTCTCTTCGCTTTGCGGCGTTGAGTGCGGGCGAAGGTGAGCGC  
ACACGGTGAGGAGGAGATCGGAACCGCGTTCAGTTGACGCGATTTCGCTCCACCCA--  
GTCAATCGTTTCGGGGTGCCCTTTACCGGGTGTCTCGGGCCGGCCGCAACGTTT-  
ACTTTGAACAAATAGAGTGTCAAAGCAGGT-GTA-  
TCCCAACGCCTGAATATCGCAGCATGGAATGATGGAATAGGACCTCGGTCCGATTTTGCTGGTCTTTATTTACTTTGGACCC  
GAGGTAA--X--  
CTCTTTCTTGATTTCGGTGGGTGGTGGTGCATGGCCGTTCTTAGTTGGTGGAGCGATTTGTCTGGTTAATTCCGATAACGAAC  
GAGACTCTAGCCTGCTAAATAGGTGACGGGTTT-TATCAATTGAAA-----  
CCGAAGGGAGTACGGAGGCGTCGGGATCAGGTGGCG-GCGATTTCGGGTGG-AAGAGGCCGGGTTTCTTTAGCT-  
GGCTTTTTCTTTCTTCCCATCGTTTCGCGCGTGGTTTTATTTTTCTTCAGCTTCGGTGTTCGGCGAAAGGGGTTTCGAGGGGGA  
AATCCTCTTGTCTTTCTTTTATCCGGCCCGATTTTGTGGAAAAAGGCTGCGTGTGGCGAGGGAAGAAGGGGAGTTTGGCGG  
GGGCTCGGTCTCTTGTCTCGGTCTGTC-ATCCCCGGCGATACCTTCTGCTCTCGCGTCCGTCACGC-----  
AGTCTTCTTAGAGGGACAAGCGCGTCCAGCCGCGTGACAATGAGCAATAACAGGTCTGTGATGCCCTTAGATGTCTGGGC  
CGCACGCGCTACTGAAGGAATCAGCGTGTTCCTCTCCGTCCGAAAGGAACGGGTA--XX--  
GTAAGCGGAGGAAAAGAACTAACAAGGATTCCTCAGTAGCGGCGAGCGAACAGGGATGAGCCAGCACCGAACCTCGC--  
--GCCCGTTGAGCGGGTGCCGAGGAATGTGGTGTTCGGGAGGATCGTGCAGCGCCTGTCCGGTA-  
TCTATCGTCCAAGTCTCCATGAACGGGGCGAGCAACCCATAGAGGGTGTGAGCCCGTAGCTT-  
AGACGAGCCGAGACCGTGCATCGGATCCCTT---  
CCCAAGAGTCGGGTTGCTTGAGCGTGCAGCCCTAAGCGGGAGGTAAACTCCTTCTAAGGCTAAATATCGCCACGAGACCGAT  
AGCGAACAAGTACCGCGAGGGAAAGTTGAAAAGAACTTTGAAGAGAGAGTTCAAGAGTGCCTGAAACCGTTTCAGGGGGTTAA  
ACGGGTGGGCCCTCGAAGGTGCAACGAG-CCCCGCTCCCGGCAC-TTGGTTGCATGCCCTCTGCTG--CGAA-GAG--  
ACCGAC-TTGATTTGGCGGCT-----CTGTTTCG-TTGGCG-AGGAGCGCATTAGCCGCGCCA--  
AGGTCGCGCAAGTGGGGGG--CCTAGTAGGACTCCCGACCGACTGGGTGT-----  
CTGTTATACGGGGCG-TTCGTTAGCG----AGTCTAA-GTCGGTTAAAAGTTCAATCTTTTTTTCCGCTGGGCGAGCGC-  
GGCGT-----CACCCAACAGTACTTGCCCGGTGCTGACCTGTCTCCTCCCGGTTG-GCAGCTC-  
GATTCAGTTTGCT-C-----TCC-----GGAGTTTGCTTGCCTTGGC-----  
TGTTGAAACCTCGTGGAGGCCAGAGCGGAGAGTAGAA--  
GTCGGGTCCCACCCGACCCGCTTTGAAACACGGACCAAGGAGTCTAACATGTGCGCGAGTCGTCGAGTCTGA-  
TACGAACTCGCGA-GGCACAATGAAAGTGAAGCG---GCC---CCGATGAGGG----TGCAT-CCG-  
CGAGGGGTGATCCCCTCT--CG-----AACAGAGCGGGCGCAACCCCTGGGCGTCCGAATGCTCGCGAGGCCA-  
ACCAGTCAAATGGTGA-----  
TCGAGTCGGCCGACGAACCCAGAGCGTACAGTGGGACCCGAAAGATGGTGACCTATGCCTGGCCAGGACGAAGCCAGGG  
GAAACCTGGTGGAGGTCCGCAGCGATTCGACGTGCAAATCGATCGTCGGAGTTGGGTATAGGGGCGAAAGACTAATCGAA  
CCATCTAGTAGC--XXX--TGCTATACCGGGCCGTTCGGTTCGGCAGTGCGA---  
ATAACGTCCGTGTCAGCTCATAGAGAGCGACGGCGCTGAGGCCCGATGAGTAGGGGGTTCGCGACGGTGGAGCGTTGAAGGG  
TTGTGGGCGTGAGCTGCCCCGAGCCGCGCTCGGTGCAGATCTTGGTGGTAGTAGCAAATACTCCAGAGGGATCCTGGAGGA  
CTGACGCGGAGAAGGGTTTCATGTGAACAGTGGTTGGACATGAGTCAGTCGATCCTAAGCCGAGGCCGAAAGCCGACCTAGT  
G-ACGGGCGTGATGCTTGTGGTT-CTATCTTTTGGTTGTTCTTGTGTTTCGGAATGTGTGGTGTG---GTGTGGTGTG-  
TGGTTGCTGTGGTTGTTGTGTGGATGATTCGGTATAGTGGCATGACGTTTCATGAGAGAGAGATCGTTGAGTTGAAGTGGGAC  
TTGGTGGCCACTCGCCAACGGAACGTTGATTATATGTGGGGTGTGGTGCATAGTTGAAAAATGGGGCACAACACACGCGAC  
GACACACACGCGCAATTTTTTCTTTCCCTTGAACCATTGAAACAAAAATACACAAAAA-AAAACG--  
TGAGACGCCAC-CCAGGTT-GAGGCGAAAGGGAATCCGGTCTGATTCGGAACCAAGGCTGCGGCTACGTCCGCGA-----  
TAAAACGACTT--CAACCCCTCGTAATG-----  
TCACGGTTCGCGGTAACGCGACACAAACCGGAGAAGCTGCCGAGAACCCCGGGAAGAGTTTTCTTTTCTGCTTGGGGACCGA  
GACCCGGAATCCCCTCGCGGGGCGAGAGGGTTATGGAT--TTA-GCTGTCAA--  
AGGCTATCCCGAAGAGCGTTCGCTTTCTGCGACGTCCTGGTTCGTTCTCGGCTGGCCCTTGAATAACCGGTGGG-  
AGGGTTA-----CGTTGTT-GG-----  
ACGTTTCGCGCCTGCTCGTACCGATATCCGCATCAGGTCTCCAAGGTGAACAGCCTCTAGTCGATGGATGAATGTGGGTAA  
Ceriodaphnia\_rotunda  
NNNNNNNNNNNNNNNNNNNNNNNNNNNNNNNNNNNNNNNNNNNNNNAGCCGCGGTAACCTCCAGCTCCAATAGCGTATATTAAGTTGTT

GCGGTTAAAAAGCTCGTAGTCGGATGTCTGTCTTCGGCCGGGCGGCCGCTC--TGAATTAAGGGTGT-  
TGGTTTTTCGCTCTGGGAGAC--GGGTGTCAAAG-  
CCCGACTCTCTTTACGGTCGGACAACATCGCCGGAGTGGTGGTCGGTGAGT---GTCGTGTTGAATGCTTTGCTTT-----  
-----CTTGTTAGCTTC-----GGCTA-----  
-----G--TGGGGGGCTTGCTGCGATCGCGACATTTGCTCCACCC---  
GTCAATCGTTCGGGGTGCCCTTCACCGGGTGTCTCGGGCGGCCGCAACGTTT-  
ACTTTGAACAAATTAGAGTGTCAAAGCAGGT-GTA-  
TCCCAACGCCTGAATATNNNNNNNNNNNNNNNNNNNNNNNNNNNNNNNNNNNNNNNNNNNNNNNNNNNNNNNNNNNNNN  
NNNNNN--X--  
CTCTTTCTTGATTCGGTGGGTGGTGGTGCATGGCCGTTCTTAGTGGTGGAGCGATTTGTCTGGTTAATTCCGATAACGAAC  
GAGACTCTAGCCTGCTAAATAGGTGACGGGTTT-TATCAATTGAAA-----  
CCGAAGGGAGTACGGAGGCGTCGGGATCAGGTGGCGAGTGGTGGTCTGGAGATCG---  
GGGTTCGGACTTGGTTTAGTTGCGAGTGCG-----CGGTTGTTTCGGG-CGAGCTCTG----  
TTGGCGCAAGT--T--GACG--GAGTTTGTTCGCGCG-GCTGTGTGT-----TCGTAGC-----  
-----GGCTAGTTCGGC-----CTTTATTTTCG-GGCCTTCGTC-ATCCCTGGCGATT-  
CTCCTGCTCTCGCGTCCGTCACA-----  
AGTCTTCTTAGAGGGACAAGCGGCGTCCAGCCGCGTGACAGTGAGCAATAACAGGTCTGTGATGCCCTTAGATGTCTGGGC  
CGCACGCGCGTACACTGAAGGAATCAGCGTGTTCCTCTCCCTGTCCGAAAGGACCGGGTA--XX--  
GTAAGCGGAGGAAAAGAACTAACAAAGGATCCCTTAGTAGCTGCGAGCGAACAGGGATGAGCCAGCACCGAACCTCGC--  
--GCCCGTAAAGCGGGTCCGAGGAATGTGGTGTTCGGGAGGATCGTGCAGCCTGTCCGGTA-  
TCAATCGTCCAAGTCTCCATGAACGGGGCGAGCAACCCACAGAGGTGTCAGGCCGTAGATT-  
AGAAGAGCCGAGACCGTGCATTTGGATCCCTT---  
CCCAAGAGTTCGGGTTGCTTGAGCGTGCAGCCCTAAGCGGGAGGTAACCTCTTCTAAGGCTAAATATCGCCACGAGACCGAT  
AGCGAACAGTACC CGGAGGGAAAGTTGAAAAGAACTTTGAAGAGAGAGTTCAAGAGTGCCTGAAACCGTTCCAGGGGTAA  
ACGGGTGGGCCCTCGAAGTTCGAAAAGGATCCCGCTCCCGGTAC-TTGGTTGTATGCCCT-TGCTG--CGA--GAG--  
ACTT-T-CTGAATTGA-AGCT-----CGATCGC-CCGGCT-CGGACCGCATTAGCCACGCCA--  
AGACCCGCTAGTGGGGGA--CTTAGTAGGACTCCGCGACCGACTGGGTGT-----  
CTGTACATACGGGACG-TTTGTTAGCG----AGTCT-----CGGTTG-----GCTTCGGCTGCTTTGACGAGCGC-  
TGCGT-----TTTCTCGACAGTACT-GCCCGGTGCTGACCTGTCTCTTTCTCGGAT----CGCCT-----  
TTCGAGGTG-----AAGCCGTAGAAGCCATTC-----  
AGAGCGGAGAGTAGAA--  
GTCGGGTCCCACCCGACCCGCTTTGAAACACGGACCAAGGAGTCTAACATGTGCGCGAGTTCGAGTAAAAATACGAAACT  
CGCGA-GGCGCAATGAAAGTGAATCG---GCC---CCGATAAGGG---TGAAT-CCG-AAAGGGGTGATCCCGTCT--CG-  
-----AATAGAGCGGGCGCAACCCCGGGGCGTCCGAA--GCTGCGAGA-----CTTTAC--TGT-----  
--  
CGAGTCCGGCCGGACGAACCCAGAGCGCACACGTTGGGACCCGAAAGATGGTGACCTATGCCTGGCCAGGACGAAGCCAGGGG  
AAACCCGTGGTGGAGGTCCGCAGCGATTCTGACGTGCAAATCGATCGTCGGAGTTGGGTATAGGGGCGAAAGACTAATCGAAC  
CATCTAGTAGC--XXX--TGCCATACCGGGCCGTCGGTCGGCAGAGCGA---ATAACGTCAGT--  
CAGCTCGAAGAGAGCGACGGCGTGAAGCCCCGACGAGTAGGGGGTTCGCGACGGTGAAGGGTTTTGGGCGTGAG  
CCTGCCCGGAGCCCGCTCGGTGCAGATCTTGGTGGTAGTAGCAAATACCTCCAGAGGGATCCTGGAGGACTGACGTGGAGAA  
GGGTTTCGTGTGAACAGTGGTTGGACATGAGTCAGTCGATCCTAAGCCGCAGGCGAAAGCCGACCTAGTG-  
ACGGGCGTGATTTCTTTT-----TTTTCTGGTGTATCTTTT-----G-  
AACTTTTGAACTTTTTCAACA-----CACACAAGTGAGAGAAAGAGAGAGAGAGAGAG-----  
-----ACCAAAAA-----  
-----GAAATCAT-----ACG--  
CGAAACGCCAC-CCAGGTT-AAGGCGAAAGGGAATCCGGTCTGATTCGGAAACCGGGCTGCGGCTACGTCCGCGA-----  
TAAA-CGACCT--CAACCTCGT--TG-----  
TCACGGTTCGGTAAACGCGACACAAACCGGAGAAGCTGCCGAGAACCCCGGGAAGAGTTTTTCTTTTCTGCTTGAGGGACCGA  
GACCTGGAAATCCCGTTCGCGGGGCGAGAGGTTACGGAT--TTA-GCTGTCAA--  
AGGCTATCCCGAAGAGCGCCGCTTTCTGCGGCGTCCGTGGTCTGCTCGGCTGGCCCTTGAAAATCCGGTGGG-  
AGGGTTA-----CGTTGTT-GG-----  
ACGTTTCGCGCCCGCTCGTACCAGATATCCGCATCAGGTCTCCAAGGTGAACAGCCTCTAGTCGATGGATGAATGTGGGTAA  
Simocephalus\_serrulatus  
NNNNNNNNNNNNNNNNNNNNNNNNNNNNNNNNNNNNNNNNNNNNNNCCCGGTAACCTCCAGCTCCAATAGCGTATATTAAGTTGTT  
GCGGTTAAAAAGCTCGTAGTCGGATGTCTGTCTTCGGCCGGGCGGCCGCTC--  
TGAATCAAGGGTGTGCGTCTTTTCGCTCTGGGAGAC--GGGTGTCAAAG-  
CCCGACTCTCTTACGGTCGGACAACATCGCCGGAGTGGTGGCCGGTGGGTC--GTCGGGTTAGCGGGTTTGGTG-----

-----TGAGGGAGTT-----CGCT-----  
-----T---TTTCTACCTTTCTCGTCCGGCGGC---TCGCTCCACCC---  
GTCAATCGTCCGGGGTGCCCTTTACCGGGTGTCTCGGGCGCCGGCAACGTTT-  
ACTTTGAACAAATTAGAGTGTAAAAGCAGGT-GTA-  
TCCCAACGCCTGAATATCGCAACATGGAATGATGGAATAAGNNNNNNNNNNNNNNNNNNNNNNNNNNNNNNNNNNNNNNNNNNNNNNNNNNNNNN  
NNNNNN--X--  
CTCTTTCTTGTATTCCGGTGGGTGGTGGTGCATGGCCGTTCTTAGTTGGTGGAGCGATTTGTCTGGTTAATTCCGATAACGAAC  
GAGACTCTAGCCTGCTAAAATAGGTGACGGGTTT-TATCAATTGAAA-----  
CCGAAGGGGGTACGGAGGCGTCGGGATCAGGTGGCG-  
GCGGTTTCGGGTGGAGCGAAGGGGGCCGTTTTAGTGTGGCCGCGGTCCGGA-----CG-  
GTTTCGTTTTTTTCGGGGTGTCTCGGC---TTGTCGTGCGT--TTCGGCGT-GCGGCGGGTTCGGGGGTGCTCTGGGAGGGC--  
G-----GGTCGGAGT-----GGCTCGGTCCCGCGGGTTC--  
TCTTTCTTCTCTCGGTGTC-ATCCCCGGCGATTTCTCCTGCTCTCGCGTCCGTCACG-----  
TGTCTTCTTAGAGGGACAAGCGGCGTCCAGCCGCGTGACAGTGAGCAATAACAGGTCTGTGATGCCCTTAGATGTCTGGGC  
CGCACGCGCGTACACTGAAGGAATCAGCGTGTTCCTCTCCGTGTCGAAAGGACCGGGTA--XX--  
GTAAGCGGAGGAAAAGAACTAACTAGGATTCCTTAGTAGCGGCGAGCGAACAGGGATGAGCCCAGCACCGAACCTCGC--  
--GCTCGGTTGAGCGGGTCCGAGGAATGTGGTGTTCGGGAGGATCGTGC CGCCTGTCCGGTA-  
TCTATCGTCCAAGTCTCCATGAACGGGGCGAGCAACCACAGAGGGTGTGAGCCCGTAGCTTTAGACGAGCCGAGACCGTG  
CATTGGATCCCTT---  
CCCAAGAGTCCGGTTGCTTGAGCGTGCAGCCCTAAGCGGGAGGTAACCTCCTTCTAAGGCTAAATATCGCCACGAGACCGAT  
AGCGAACAAAGTACCGCGAGGGAAAGTTGAAAAGAATTTGAAGAGAGAGTTCAAGAGTGCCTGAAACCGTTTCAGGGGGTTAA  
ACGGGTGGGCCCTCGAAGGTGCAACGAG-CCCCCGTCCCGGCAC-TTGGTTGCATGCCCTCTGCTG--CGA--GAG--  
ACCG-C-CTGAATTG---GCG-----CGCTCGAGCCGGCG-GGGACCGCATTAGCCGCGCCA--  
AGGTCCGCTAGTGGGGG--CCAAGTAGGACTCCGCGACCGACTGGGTGT-----  
CTGTTAAACGGGGCG-TTCGTTAGCG---AGTCT-----TGTTGA-----GTTTCGGCTTCTTTGGCGAGCGC-  
GGCGTCTTTTTCTTTCCCAACAGTACC-  
GCCCGTCTGTGACCTGTCTCTCTCGGGGTTTGGCGCGTAGTTTTCGCGTTCGCGGCGTCTCTTAATCGGGTGGCGTTTCG  
GGCCCGAACAGTACGTTCC--ATCCCGCGGAGGCCAGAGCGGAGTAGAA--  
GTCGGGTCCCACCCCGTCTGAAACACGGACCAAGGAGTCTAACATGTGCGGAGTCTGAGTCTGT-  
TAGAAAATCGCGA-GGCCAATGAAAGTGAAGCG---GCC---CCGATGAGG---TGCAAT-CCG-  
CGAGGGGTGATCCCGTCT--CG-----AACAGAGCGGGCGCAACCCCGGGGCGTCCGAA--GCCGCGAGGTG----  
---CCTCACGGTAT-----  
CGAGTCCGGCCGGACGAACCCAGAGCGCACACGTTGGGACCCGAAAGATGGTGACCTATGCCGAGGACGAAGCCAGGGG  
AAACCCGTGGTGGAGGTCCGCGAGCGATTCTGACGTGCAAATCGATCGTCCGAGTTGGGTATAGGGGCGAAAGACTAATCGAAC  
CATCTAGTAGC--XXX--TGCCATATACCGGGCCGTCGGTCCGCGAGCGA---ATAACGTCGGC--  
CAGCTCGAAGAGAGCGGCGCGCTGAGGCCCGACGAGTAGGGGGTTCGCGACGGTGAAGGGTTGTGGGCGCGAG  
CCTGCCCGAGCCCGCGTCCGTTGACAGATCTTGGTGGTAGTAGCAAATACTCCAGAGGGATCCTGGAGGACTGACCGGAGAA  
GGGTTTCATGTGAACAGTGGTGGACATGAGTCAGTCGATCCTAAGCCGCAGGCGAAAGCCGACCTAGTG-  
ACGGGCGTGATTTTTTACA-----AAAGAAAAAGAAATATGTGAAAGA-----GAGAG-  
AAGTGGTGAATGATGAAGGA-----CGCGGGGACCGGAGAAAAGAAGTTGAGGAAGGTGGGT-----  
---ATGCCCTTTTC-----CGAGATTCCTGCTCTCTCT-----AACCGGAAAATT-----CAACA-----  
-----GACATCATCTTTCTCTTTTTTGGCTTTTCTGATTTCTTTT---C-----  
AAACGATCGAGACGCCAC-CCAGGTT-  
AAGGCGAAAGGGAATCCGGTCTGATTCGGGAACCGGGCTGCGGCTACGTCCGCGA-----TAAA-CGACCT--  
CAACCCCTCGT--TG-----  
TCACGGTCCGGTAACGCGACACAAACCGGAGAAGCTGCCGAGAACCCCGGAAGAGTTTTCTTTTCTGCTTGGAGGACCGA  
GACCCGTGAAATCCCGTCCGCGGGGCGAGAGGGTTACGGAT--TTA-GCTGTCAA--  
AGGCTATCCCGAAGAGCGCCGCTTTCTGCGGCGTCCGTTGCTCTCGGCTGGCCCTTGAAAAATCCGGTGGG-  
AGGGTTA-----CGTTGTT-GG-----  
ACGTTCCGCGCCCGCTCGTACCAGATATCCGCATCAGGTCTCCAAGGTGAACAGCCTCTAGTCGATGGATGAATGTGGGTAA  
Scapholeberis\_rammneri  
TTTAACGAGGAACCATTTGGAGGGCAAGTCTGGTGCCAGCAGCCGCGGTAACCTCCAGCTCCAATAGCGTATATTAAGTTGTT  
GCGGTTAAAAAGCTCGTAGTCGGATGTCTGTCTTCGGCCGGGCGGCGCCGCTC--TGAATCAAGGGTGTTCGCT-  
TTAACGCTCTGGGAGGC-GGGTGTCAAAG-CCCGCTTCTCTTACGGTCCGACAACATCGCCGAGTGGTGGGCTAGGGCC-  
--GCGGGGTCG-CCGGCGTGT-----CGGG-GTCAA-----CCCTT-  
-----CGCGTTCGGTTCCCGTGG-  
TACTCCCACCCGATCAATCGTTCGGGGTGCCTTACCGGGTGTCTCGGGCGCCGGCAACGTTT-



ACTTTGAACAAATTAGAGTGTCTCAAAGCAGGT-GTA-  
TCCCAACGCCTGAATATCGCAGCATGGAATGATGGAATAGGACCTCGGTCCGATTTTGTCTGGTCTTTTACT-  
TTTGGACCCCGAGGTAA--X--  
CTCTTTCTTGATTTCGGTGGGTGGTGGTGCATGGCCGTTCTTAGTTGGTGGAGCGATTTGTCTGGTAAATCCGATAACGAAC  
GAGACTCTAGCCTGCTAAATAGGTGACGGATTT-  
TATCAATTGAAAAAAACCGAAGGGGGTACGGAGGCGTGGGATCAGGTGGCG-GCGATTTCTGGGGCTTTTCGGG-  
CCGGCGGCGGTTGTC-GTCTGCGGC-----  
GTGGGGTGTTCGCTGCGCATGGCGGGGGCTCGTCTCTCGT--CGCGTTGTGCGTGCCTCTCGCGTCCGTTGGCGGCT-----  
-----GTCGTCGT-----TGAACTCGGC-----T---GTTTCG-  
GGTCGTCGTC-ATCCCCGGTGTTT-CTCCTGCTCTCGCGTCCGTCACA-----  
CGTCTTCTTAGAGGGACAAGCGGCTCCAGCCGCTGACAGTGAAGCAATAACAGGTCTGTGATGCCCTTAGATGTCTTGGG  
CGCAGCGCGCTACACTGAAGGAATCAGCGTGTTCCTCTCCCTGTCCGAAAGGACCGGGTA--XX--  
GTAAGCGGAGGAAAAGAACTAACAAGGATTCCTTAGTAGCGGCGAGCGAACAGGGATGAGCCAGCACCGAACCTCGC--  
--GCTCGGTGAGCGGGTCCGAGGAATGTGGTGTTCGGGGGGATCGTGCAGCGCTGTCCGGTA-  
TTTATCGTCCAAGTCTCCATGAAAGGGGCGAGCAACCCATAGAGGGTGTGAGGCCCGTAGAGTACAGACGAGCCGAGACCGTG  
CATTGGATCTTTC---  
CCCAAGAGTCGGGTTGCTTGAGAGTGCAGCCCTAAGCGGGAGGTAAACTCCTTCTAAGGCTAAATATCGCCACGAGACCGAT  
AGCGAACAAAGTACCGCGAGGGAAAGTTGAAAAGAAGTTTGAAGAGAGAGTTCAAGAGTGCCTGAAACCGTTTCAGGGGGTTAA  
ACGGGTGGGCCCTCGAAGGTCGAACGAG-CCCTCGCTCCCGGCAC-TTGGTTGCATGCCCC--GCT---CGAG-CAG--  
AGAGTT-TTCACAAG---CTC-----CTATCACGCTCTTGTGGGAGCGCATTAGCCGCGCCA--  
AGGTCCGCTAGTGGAGGG--TCTAGTAGGACTCCGCGACCGACTGGATGC-----  
CCGTCACACGGGGCGATTTCGTTAGCGT---GGTGTAT-TGAAGTCT-----  
TCGCGGGCTTCGCTCTCCTCGCGCGTTCGT-----CACTCGAGGCTGCC-GTCCGGTGTGACCTGTGTTCCTTTTCGT-  
----CGCAC-----CCCGGTGCG-----CGTGTG-----  
AGGCCAGAGCGGAGAGTAGTA--  
GTCGGGTCCCACCCGACCCGCTTTGAAACACGGACCAAGGAGTCTAACATGTGCGCGAGTTCGTCGAGTGTGT-  
GACGAACTCGCGA-GGCGTAATGAAAGTGAAGCG---GCT---GCGTTTCGG-----CGCG--CCG-  
CGAGGGGTGATCTCGTCT--CG-----AACAGAGCGGGCGCAACCCCTGGGCGTTCGAA--  
GTCGCGAGGCGGCGCCGTTTCGCGGTTTTTCAAGTCC-  
GTCGAGTCGACCGAACGAACCGAGAGCGTACACGTTGGGACCCGAAAGATGGTGACCTATGCCTGGCCAGGACGAAGCCAGG  
GGAAACCCTGGTGGAGGTCCGCGAGCGATTCTGACGTGCAAATCGATCGTTCGAGTTGGGTATAGGGGCGAAAGACTAATCGA  
ACCATCTAGTAGC--XXX--TGCCTATACCGAGCCGTCGGTCCGCGAGCGAGA---  
ATAACGTCGTTTAAACGCTCGAAGAGAGCGACGGCGCGGAGGCCCGACGAGTAGGGGGTTCGCGACGGTGAGCGTTGAAGGG  
TTGTGGGCGCGAGCCTGCCCGGAGCCGCGTCCGTTGCGAGATCTTGGTGGTAGTAGCAAATACTCCAGAGGGATCCTGGAGGA  
CTGACGCGGAGAAGGGTTTTATGTGAACAGTGGTTGGACATGAGTCAGTCGATCCTAAGCCGCGAGGCGAAAGCCGTCCTAGT  
G-ACGGGCGTGATGAAAGTG-----TGATACACCAGAGAGAAGA-----GAACG-AA-  
TTTTGTATTTTCT-----T-----TCGAAAGAGAGAAAAGAAAAAG-----  
-----T-----TTG-AAC-----  
-----TTTTTTT-----TTCTGGAACATACA-----ATACAA-  
AGATACGCCATTCTAGTTC-AAGGCGAAAGGGAATCCGTCCTGATTCCGGAACCGAGCTGCGGCTACGTCCCTGA-----  
TGATACGACCT--CAACCCTCGTAAAT-----  
TCATGGTTCGCGGTAACGCGATACAAACCGGAGAAGCTGCCGAGAACCCCGGAAGAGTTTTCTTTTCTGCTTGAGGGACCGA  
GACCCTGGAATCCCGTTCGTTGGGGCGAGAGGGTTACGGAT--TTA-GCTGTCAA--  
AGGCTATCCCGAAGAGCGCCGCTTTCGCGGCGTCCGTTGGTTCGTTCTCGGCTGGCCCTTGAAAATCCGGTGGG-  
AGGGTTA-----CGTTGTT-GG-----  
ACGTTTCGCGCTCGTTCGATACCGATATCCGCATCAGGTCTCCAAGGTGAACAGCCTCTAGTCGATGGATGAATGTGGGTAA  
Moina\_affinis  
TTTAAACGAGGACCCATTGGAGGGCAAGTCTGGTGCAGCAGCCGCGGTAACCTCCAGCTCCAATAGCGTATATTAAGTTGTT  
GCGGTTAAAAAGCTCGTAGTCGGATGTCTGTCTTCGCGCCGGGCGGCGCCGCTC--TGAATCAAGGGCGC---GC--  
GCTCGCTCTGGGTGTC-GGGCGTCAAAA-CTCGACACTCTTCGCGGTTCGGACAACACCGCCGAGTGGCGG--GGTCG----  
-----GCCG-----GCGAGT-----  
-----CGTTCGCGGCCCCG-CG---  
GTTCCCCGCCG---TAATCGTGCGGGGTGCCTTTCGCCGGGTGTCCCGTGCGGCCGGCAACGTTT-  
ACTTTGAACAAATTAGAGTGTCTCAAAGCAGGT-GCA--  
CACCACGCTGAATACTGCAGCATGGAATGATGGAAGAGGACCTCGGTCTTGTGTTTGTCTTTTCTCT-----  
AGACCCGAGGTAA--X--  
CTCTTTCTTGATTTCGGTGGGTGGTGGTGCATGGCCGTTCTTAGTTGGTGGAGCGATTTGTCTGGTAAATCCGATAACGAAC

GAGACTCTAGCCTGCTAAATAGGCGACGGATTT-CAA-----GGCC-----CGCAAGGGTCC-----  
GTTACTGGCCCGGATGGCCGTGCG-----GGATCAGGCC-----  
-----GTGTCGGTCGTC-----GGGCAACTCGGCG-----  
-----GTCGGCGCG-----  
--TCCCCGTCGGCGGCCCGG---TCGCGTCCGTCGCG-----  
TCTCTTCTTAGAGGGACAAGCGGCGTCCAGCCGCGTGACAGTGAGCAATAACAGGTCTGTGATGCCCTTAGATGTCCTGGGC  
CGCACGCGCGCTACACTGAAGGAATCAGCGTGTTCACCGTCCCTGTCCGAGAGGACCGGGTA--XX--  
GTAAGCGGAGGAAAAGAACTAACAAGGATCCCCCAGTAACGGCGAGTGAACAGGGATGAGCCCAGCACCGAACCTCGA--  
--GCCCGCAAAGCGGACTCTGAGGAATGTGGTGTTCGGGAGGATCGTGCGCGTCTGTCCGGCA-TT---  
CGTCCAAGTTCATGAACGGGGCGAGCAACCCACAGAGGGTGTGAGCCCGTAG-CT-  
AGACGAGCCGAGACCGTGCATCGGATCT-TT---  
CCCAAGAGTCGGATTGCTTGAGAGTGCAGTCCCTAAGCGGGAGGTAAACTCCTTCTAAGGCTAAATACCGCCACGAGACCGAT  
AGCGAACAAGTACCGCGAGGGAAAGTTGAAAAGAACTTTGAAGAGAGAGTTCAAGAGTGCCTGAAACCGTTCAGGGGGTTAA  
ACGGGTGAGCCCTCGAAGTCTGAACGTG-TCCCCGCTCCCGGCAC-TCGGTGCATGCCCTC-GTCG--TC---GAG--  
ACCG---TCGCAACG---GC-----GGCTCGTCGATG-GGGATCGCATTAGCCGCACCG--  
AGGTCGCTAGTGGGGGA--CCGAGTAGGACTCCGCGACCGATTGGA-GAG-----  
TCGTCATACGGGGCG-TCG-TTNGCGT---CGTTT-----C-GC-----TTCGGC--GTGCGCGTGCGC-  
GGCGG-----TCGCCGGCGGTCTC--TCCGATCGTCAGCCCTGTCACCCGCGG-----GCGG-----  
CCACGGC-----CGATTTCG-----  
GGGCCAGAGCGGAGAGTAAAAA-  
GTCGGATCTCACCCGACCGTCTTGAAACACGGACCAAGGAGTCTAACATGTGCGCGAGTCTGTCGAGTCTTTTTACGAAACT  
CGCGA-GGCGCAGTGAAAGCGAAGCA---GCC---CCGACGAGG-----GTGT-CTG-CGAGGGGAGATCCCGTCT--CG-  
-----AGCAGAGCGGGCGCATCCCTAGGGCGTCCGGA--GCCGCGATT-----T-----  
-----  
GTCGGCCGGACGAACCCGGAGCGTACACGTTGGGACCCGAAAGATGGTGACCTATGCCTGACCAGGACGAAGCCAGGGGAAA  
CCCTGGTGGAGGTCCGCAGCGATTCTGACGTGCAAATCGATCGTCCGAGTTGGGTATAGGGGCGAAAGACTAATCGAACCAT  
CTAGTAGC--XXX--TGCCATACCCGACCGTCCGTCGGCAGAGCGA---ACG--TTCCGAGCCGTCGAGG-  
CAGAGAAGGAACGCCGAGGCCCCGACGAGTAGGGGGTCCGCGACGGTGAGCGTAGAAGGATC-  
TGGGCGCGAGCCTGTCCGAGCCCGCTCGGTGCAGATCTTGGTGGTAGTAGCAAATACTCCAGAGGGATCCTGGAGGACTG  
ACGTGGAGAAGGTTTCATGTGAACAGTGGTGGACATGAGTCAGTCGATCCTAAGCCGAGGGGAAACCCGGCCTAGTG-  
ACAGGCGTGACTT-----CATATAAA-----  
CGCCCGGGCG-----AGCGAGCAATCGCAAGCC-----  
-----CGGGCGCCA-----  
-----AAAAGTACGAAGCGCCTA--  
CTAGTC-GAGGCGAAAGGGAATCTGGTCCGATTCAGAACCCGAGCTGCGGCTACGTCCTGAC-----GTGA-CGACT-----  
---CGTCGTC-TC-----TA-  
CGGTCGCGGTAACGCGACACAGACCGGAGAAGCTGCCGAAAACCCCGGGAAGAGTTTTCTTTCTGCTTAAGGGACCGACAC  
CCTGGAATCCCGTCCGCGGGGCGAGAGGTTGCGGAT--ACG-GCTGTCAA--  
AGGCCATCCCGAAGAGCGCCGCTTTCCGCGGCGTCCGTGGTCTTTTCGGCTGGCCCCGAAAATCCGGTTGG-  
AGGGCTA-----CGTCATT-GG-----  
ATGTTGCGGCTCGCTCGTACCGATATCCGCATCAGGTCTCCAAGGTGAACAGCCTCTAGTCGATAGAAGAATGTAGGTAA  
                    *Ofryoxus\_gracilis*  
TTTAACGAGGACCCATTGGAGGGCAAGTCTGGTGCCAGCAGCCGCGGTAACCTCCAGCTCCAATAGCGTATATTAAGTTGTT  
GCGGTTAAAAAGCTCGTAGTCGGATGTCTGTCTTCGGCCGGGCGGCGACTCTC--TGAATTAAGGGAGCTTCGC--  
TTTCGCTCTGGGAGGT-CGGTGTCAAAG-  
CCGGTCTCTTTCGCGGTCGGACAACACCCCGGAGTGGTGGCCAGCCGCGGGGATCATCG-CTTGCGCGG-----  
-----GCGGTTTTC-----GGCT-----  
-----G-TCTG---CGTCCGCGACCTTCGCG---CGGTCCACCCG-----  
TAATCGTCCGGGGTGCCCTTACCAGGTTGCTCGGGCGGCCGCAACGTTT-  
ACTTTGAACAAATTAGAGTGCTCAAAGCAGGT-  
GCAACCATAACGCTGAATATCACAGCATGGAATGATGAAAGAGGACCTCGGTCTTATTTTGTGGTCTTTTCTT--  
CATAGACCCGAGGTAA--X--CTCTTTCTTGATTCCGGTGGGTGGTGGTGCATGGCCGTTCTTAGTTGGTGGGA-  
CGATTTGCTGGTTAATTCGGATAACGAACGAGACTCTAGCCTGCTAAATAGGTGGCGGGTTT-TGATTTTCGGCG-----  
CGCCGGGGTTTTG---TTTCGGGTTTTGCTCCGGCGCGTCCGTACT-  
GGGAGTTCGAGCCGGCTGGATCAGGGCTCGGTT-CG-----GGGCTGCGGTGTCGGTGGGCTGCGG-----  
CGGTGGTGCCT--T-----CG--GGGCGTTTTCGGCGT--TTTCGGGCGTGC-----T-----GTCGCTGT-----  
-----GGTCTGTGCGGCTCGC-----GGTTTCG--G--GTCGGG-

TTCCCGGCCGTAAACTCGGGCTCTCGCGTCCGTCACA-----  
GCTCTTCTTAGAGGGACAAGCGGCGTCCAGCCGCGTGACAGTGAGCAATAACAGGTCTGTGATGCCCTTAGATGTCCTGGGC  
CGCACGCGCGCTACACTGAAGGAATCAGCGTGTTCCTCTCCCTGTCCGAAAGGACCGGGTA--XX--  
GTAAGCGGAGGAAAAGAACTAACAAGGATTTCCCTAGTAGCGGCGAGCGAACAGGAATGAGCTCAGCACTGAACCTCGA--  
--GCCCGCAAAGCGGACTCTGAGGAATGTAGTGTTCGGGAGGATCGTGCGCGTCTGTCCGGTA-  
TTTATCGTCCAAGTCTCCATGAACGGGGCGAGCAACCCACAGAGGGTGTGAGGCCCGTAGACC-  
AGACGAGCCGAGACCGTGCATCGGATCCCTT---  
CCCAAGAGTCGGGTGTGCTTGAGCGTGCAGCCCTAAGCGGGAGGTAAACTCCTTCTAAAGCTAAATATCGCCACGAGACCGAT  
AGCGAACAAAGTACCGCGAGGGAAAGTTGAAAAGAACTTTGAAGAGAGAGTTCAATAGTGCGTGAAACCGTTTACAGGGGGTTAA  
ACGGGTGGGGCCCTCGAAGGTGCAACGTG-CCTCCGCTCCCGGCAC-TCGGTAGCATGCCCTC-GGCG--CCC--GGG--  
ATCG---TCGACAAG---AC-----GTCCCGGCGCTG-GGGATCGCATTAGCCGCGCCG--AGTCCGCTAGTGGG--  
-A--CCA--TAGGACTCTGCGACCGGTTGGGTGTG-----CTGCTACAAGGGCCG-  
GCGGTTAGCGA---GCTTT-----C-GCGG-----TTTCGGCT-GCGTTGCGAGCGC-CCCG-----  
TTCCGAGCAGTCCC-GCCCGACCGTGACCTGTCTCCTCCCC-----TCTTAAG-----  
-----TTACGGG-----AGGCCAGAGCAGAGAGTAGAA--  
GTCGGGTCCCACCCGACCCGCTTTGAAACACGGACCAAGGAGTCTAACATGTGCGCGAGTCTGCGAGATTTTACTACTAAACT  
CGCGA-GGCGCAATGAAAGTAAAGCA---GCC---CCGATGAGG-----GTGC-CTG-CGAGGGGAGATCCCGTCT--CG-  
-----AACAGAGCGGGCGCATCCCCAGGGCGTTCGAA--GCCGCGACT-----T-----  
-----  
GTCGGCCGAACGAACCCGGAGCGCACACGTTGGGACCCGAAAGATGGTGACCTATGCCTGACCAGGACGAAGCCAGGGGAAA  
CCCTGGTGGAGGTCCGCGAGCGATCTGACGTGCAAATCGATCGTGGAGTTGGGTATAGGGGCGAAAGACTAATCGAACCAT  
CTAGTAGC--XXX--TGCCCTATACCGGGCCGTCGGTCCGCGAGTGCAGATA-  
ACGGACTCTAGCCCGCAGAGGGCGCAAAGAGCCGCTGAGGCCCGACGAGTAGGGGGTTCGCGACGGTGTGAGCGTGAAGGG  
TTGTGGGCGCGAGCCTGCCCGGAGCCGCCGTCGGTGCAGATCTTGGTGGTAGTAGCAAATACTCCAGAGGGATCCTGGAGGA  
CTGACGCGGAGAAGGGTTTCATGTGAACAGTGGTTGGACATGAGTCACTGATCCTAAGCCGCGAGGAGAAATCCGACCTAGT  
G-  
ACGGGCGTGAGTTGTATCGATGCGATCGGTTTCGTATATAAAGCTTTTAGCGATGGTTGTTTCCCGTTTTTTTTTTCGCGCGT  
CTGCGCGTTAATCTCTTGTCTTTTAGTACCGCTTCTTCGCGCGCCAGGCGGCGAGTTCGAAATCCGC-----  
TTGGCCCGCTGTGCGGAGAAAAAACGAGAGAGAGAGGCG-----CGGGCGCTGTGAGCGAGAGAGCGGGTA-----  
-----AAGATCTTCGAGCAGGCGGAAAAATACACCGAGAGCTGTGTATA----  
TCAAAAACAAGAGGCGCTAC--CAGGTT-  
AAGGCGAAAGGGAATCCGGTCTGATTCCGGAACCAGGCTGCGGCTACGTCCGAAA-----CTGAACGACCT--  
CAACCCCTCGTT-TG-----  
TCTCGGTGCGGGTAACGCGACACAAACCGAAGAAGCTGCCGAGAACCCCGGGAAGAGTTTTCTTTTCTGCTTGAGGGACCGA  
GACCCCTGGAATCCCGTCTGTTGGGGCGAGAGGGTTACGGAT--TCG-GCTGTCAA--  
AGGCTATCCCGAAGAGCGCCGCTTTCTGCGGCGTCCGTGGTCTGTTCTCGGCTGGCCCTTGAAAATTCGGTGGGGAGGGTTA  
-----CGTTGTTTGG-----  
ACGTTGCGCCTGCTCGTACCGATATCCGCATCAGGTCTCCTAGGTGAACAGCCTCTAGTCGATGGATGAATGTAGGTAA  
Diaphanasoma\_sp  
TTTAACGAGGACCTATTGGAGGGCAAGTCTGGTGCCAGCAGCCGCGGTAACCTCCAGCTCCAATAGCGTATATTAAGTTGTT  
GCGGTTAAAAAGCTCGTAGTTGGATTCCCTGTCTTCGGCCGGGCGG-----CTAATGGTTTAGGC----  
CGTTAGACTGCTTTTGG-GTCCGGGTGTCAAAGCCTGG-  
GCCCTTTAACGGCCGGACAATACCACCGGAGGTGCGGGGATAGTA-----GTCG-----  
-----GCTCT-----  
-----CGGGC-----  
GGGCTATGACGACCGCACCAATATAACAGTCCGAGGTGCCCTTAACAAGGTGTCTCGGGCGGCCGGTAACGTTT-  
ACTTTGAACAAAATAGAGTGCTCAAAGCAGGT-ACTT---  
CACTGCCTGAATATCACAGCATGGAATGATGGAATAGGACCTCGGTCTTATTTTGTGGTTTTCTCT-----  
AGACCCGAGGTAA--X--  
CTCTTTCTTGATTCCGGTGGGTGGTGGTGCATGGCCGTTCTTAGTTGGTGGAGCGATTTGTCTGGTTAATTCGGATAACGAAC  
GAGACTTAGCCTGCTAAATAGGTGGCTGGTTTTMTRK-----  
RARYCGYAARAT---TSTTT--GGGTT-----CGCAGTCTTTBTGGATCAGGGBGG-----  
CGGGGTTTGGTTTCVGGCGGCGG-----GCGTVHCGTTGC---GTGCCCTCGGTGCGTGGCGGGVCGTTC-  
-----GTC-----GTCG-----  
GGGCCGGCHCCBDCYC-----CCCGVAGAGCCAGCTGCGTTCTCGCGTCAGTCACGA----CT-  
CTTCTTAGAGGGACAAGCGGCGTTTAGCCGCGTGACAGTGAGCAATAACAGGTCTGTGATGCCCTTAGATGTCCTGGGCCG  
ACGCGCGCTACACTGAAGGAATCAGCGTGTTTTCTCCCCCTGTCCGAGAGGACCGGGTA--XX--

NNNNNNNNNNNNNNNNNNNNNNNNNNNNNNNNNAGGATTCCCTCAGTAGCGGGCAGCGAACAGGGATCAGTCCAGCACCGAATCTCGC--  
--GCTCC-TAAA--GGGCGCCGAGAAGTGTGGTGTTCGGGAGGACCTCGAGCGTCTGTCCGGTA-  
CGTATCGTCCAAGTCTCCATGAACGGGGCTATCAACCCACAGAGGGTGTCAAGCCCCGTAGGCT--  
GGCGAGCCGAGACCGCGCACCGGGTCCGTT---  
CCCAAGAGTCCGGTTGCTTGAGCGTGCAGCCCTAAGCGGGAGGTAAACTCCTTCTAAGGCTAAATATCGCCACGAGACCGAT  
AGCGAACAAAGTACC GCGAGGGAAAGTTGAAAAGAAGTCTTGAAGAGAGAGTTC AAGAGTGC GTGAAACCGTT CAGGGGGTTAA  
ACGGGTGAGCCCTCGAAGGTCGAG--GCGTCTTCTTCCCG-----CGTTTCGAGTCGGGGCTTTTKD---GGT-----  
----TCGGGGGATC-----CGTAACAGGACTSCCGGCTBSGAAGCATCCCGCTCGGGC-----GCCGCAAGTGAAGGG-  
-CGCGGTAGGACTCCCGGACCGGCTGAGACG-----CCGTCAGAAGGGC-  
CGTCGGTAACGAGAGTCGTA-----GGGGTTCGCTCCTGC-----TTCATT-----CGTCC-GGCG-----  
RCATAGACGGTCA--CTCGGCCGTGACCWGTTCCTC-----TCGGGGCCG-----CGTGCCG-----  
-----CACCTCGA-----GAGCTAATAGCGGAGAGTAA--  
AAGTCGGGTCTCACCCGACCCCGTCTTGAACACGGACCAAGGAGTCTAACATGTGCGGAGTCTGTCGAGTVG-  
ATAACTAAACTCGCGA-GGCGCAATGAAAGTAAAGT----GTC--CCCATGAG-----GGTGCAGCA-  
CGATGGGAGATGCCGTCTCT--ATAAC----AAACCGGAGCGGCCGCATCCCAAGGGCGTTCGATG--CCGCG-----  
-----  
CCTCAGCCGGCCGAACGAACCCAGAGCGTACACGTTGGGACCCGAAAGATGGTGACCTATGCCGACCAGGACGAAGCCAGG  
GGAACCCCTGGTGGAGGNNNNNNNNNNNNNNNNNNNNNNNNNNNNNNNNNNNNNNNNNNNNNNNNNNNNNNNNNNNNNNNNNNNNNNNN  
NNNNNNNNNNNNNN--XXX--TGCTATACCGTGCCGCCGGTTCGGCAGCGWWWWT-RTGRCGGC-----  
CGCAGAGGGTCHGA--  
GYCRYACTGAAGCCCCGGTGTAGTAGGGGGTTCGCGACGGTGTGAGCGTTGAAGGGTGTGGGGCGGAGCCTGCCCGGAGCCGCC  
GTCGGTGCAGATCTTGGTGGTAGTAGCAAATACCTCCAGAGGGATCCTGGAGGACTGACGCGGAGAAGGGTTTCATGTGAACA  
GTGGTTGGACATGAGTCAGTCGATCCTAAGCCGCAGGAGAAATCCGTCTAGTGTACCGGTGTGAC-----TTRYDD-  
-----CTVCHBYDT-----TBDHHNDBDT-----  
-----AYGAGAG-----  
-----GCACCG--CTGGGTC-  
AAGGCGAAAGGGAATCCGGTCCTAATTCGGAACCAGGCTGCGGCTACGTCCGATC-----TG--  
AAACACCCGTTTCA-----  
TTCGGTTCGCGTAAACGCGACACAAACCGGAGAAGCTGTGAGAACCCCGGGAAGAGTTTCTTTTCTGCTTGAGGGACCGAG  
ACCCTGGAATTCGTCGCGGAGCGAGAGGGTTTTGGATGAAAGCGCTG-  
TAAAAAGGCGATCCCGAAGAGCGGCGCGTTTTCCGCGCCGTCCGTGGTCTCTCGACTGGCCCTTGAAAATCCGGCGGG-  
AGGGTTA-----CGTTTT--GG-----  
ACGTTTCGCGCCTGTTTCGTACCGATATCCGCATCAGGTCTCCTAGGTGAACAGCCTCTAGTCGATAGAAGAATGTAGGTAA  
Latonopsis\_occidentalis  
TTTAAACGAGGACCTATTTGGAGGGCAAGTCTGGTGCAGCAGCCGCGGTAACCTCCAGCTCCAATAGCGTATATTAAGTTGTT  
GCGGTTAAAAAGCTCGTAGTTGGATTCCTGTCTTCGGCCGGGCGGTGCCGTTCCATCGTAGGGGCGT--  
TTTTGCACTGCCTTGGG-  
ACGGTGGCCTCAAAAACCACCGTCTTTTAAACGGCCGACAATACCGCCGAGTGGCGGGACCAACG-----CGCGT--  
T-GTGGGAA-----AGAGGGTCT-----CGCACCC--  
TCCGACTTGTTTCGCGTGCCCGCCGTAATCGTTCGAGGTGCCCTTAACAAGGTGTCTCGGGCGGCCGGTAACGTTT-  
ACTTTGAACAAATTAGAGTGCCTCAAAGCAGGT-  
GCATACCCCTTCGCTGAATATCACAGCATGGAATGATGGAATAGGACCTCGGTCTTATTTTGTGGTTTTCTTTTCT--  
TTTAGACCCGAGGTAA--X--  
CTCTTTCTTGATTCGGTGGGTGGTGCATGGCCGTTCTTAGTTGGTGGAGCGATTTGTCTGGTTAATTCGATAACGAAC  
GAGACTTAGCCTGCTAAATAGGTGGCGGGTTTTGTGTTCCTT-----TTTCTT-  
TACTTCGGTGGAGAAAAATACACGTTTAAAGGGTT-----CGGTGTTCGTCGGGATCAGGGCGGGC-----  
--TTCGGAGTCCGTTTCAGCGGGAGTC-----GGGAGAGGTTG-----  
GAGGGGCGGGGTGGTTCGCCATTCTC-----GTCTTTTTCT-----  
TCCTCTGTCGACTTTTTTTG----  
CTGGGGCGGTTCTGGGGTCTTAGCTCCCCGGCGGTTTCGCACCGTTCTCGCGTCCGTCACGA----  
TTTCTTCTTAGAGGGACAAGCGGCGTCCAGCCGCGTGACAGTGAGCAATAACAGGTCTGTGATGCCCTTAGATGTCCCTGGG  
CGCACGCGCTACACTGAAGGAATCAGCGTGTCTTCTCCCCCTGTCCGAAAGGACCGGGTA--XX--  
NNNNNNNNNNNNNNNNNNNNNNNNNNNNNNNTTCTCAGTAGCGGGCAGCGAACAGGGAWCAGTCCAGCACCGAACCCTCGC--  
--GCTCCGTRAA--  
GGGCGCCGAGGAATGTGGTGTTCGGGAGGATCGTGC GCGTCTGTCCGGCAKTTTATCGTCCAAGTCTCCATGAACGGGGCTA

TCAACCCACAGAGGGTGTCCAGGCCCGTAGGCT--  
GGCGAGCCGAGACCGTGTACCGGATCTTTTTTTTCCCAAGAGTCGGGTGCTTGAGCGTGCAGCCCAAAGCGGGAGGTAAACT  
CCTTCTAAGACTAAATATCGCCACGAGACCGATAGCGAACAAGTACCGCGAGGAAAAGTTGAAAAGAACTTTGAAGAGAGAG  
TTCAAGAGTGCCTGAAACCGTTCAGGGGGTTAAACGGGTGAGTCTCGAAGGTCGAA--  
GGATCCCTCCTCCCCTCGTGCAGGCGTCCGGGTCCGGGCTTTTTTTTTT-GGTG-ATCTCTTTTCGCGATTTTCGGTC-  
GCGTTAAAAGGACGCCGGGTCKGGATCGTACGAGGGCGCCGC--CGGCCGCAAGTGAGGGG--  
TCTGGTAGGACTCCGCAACCGGCTGGGAAAATTTTTTTTTTTCTTTGTTTCCGTCAGAAGGGT-  
CGTCGGTAACGAGACGAGCATATCGAGGATTTAAAYCGTYT----TCGGTTGTTTCGTT-CTCGTCC-GGCG-----  
RTTCCGGACGGTACA--CCCGGCCGT--TTAACCTTT-----TGTGTMTCY-----CYCYWWCG-----  
-----AGGGAGAC-----  
GCACACACAGCGGAGTAACCGAGTCGGAACACCCGACCCGCTTGAAACACCGACCAAGGAGTCTAACATGTACGCGA  
GTCGTGAGTTCGCAAAACGAACTCGAGA-GGCGAAATGAAAGTAAAGTT--GGCC--CCCGATGAG-----  
GGTGTGCGA-CGAAGGGAGATGCCGTCTCTCGATATCCA--GAAACGAGCGGCCGCATCCCTTGGGCGTCCGAAG--  
CCGTGAAGGTTTCGGCAGCGGGCTCGTCTCGCTGTTTGTTCGGTTCGGCCGACCGGACCGAGAGCGTACACGTTGGGACCCGA  
AAGATGGTGACCTATGCCGAGGACGAAGCCAGGGGAAACCCGTTGNNNNNNNNNNNNNNNNNNNNNNNNNNNNNNNNNNN  
NNNNNNNNNNNNNNNNNNNNNNNNNNNNNNNNNNNNNNNNNNNNNNNNNNNNNN--XXX--  
TGCCATATACCGGGCCGCCGGTTCGGCAGAGCGATA-AACGCGG-----ATATTGTACCCGA--G-----  
CTGAGCTCCCGGCGAGCAGGGGGGGCGCGACGGTGCAGCGCCGAAGGGTTGGGAGGGCGAGGCTGCCCGGACCCGCCGCCGC  
GCAGATCTTGGGATATTAGCGAATACTCCAGAGACATCTGGAGGACTGGCGCAATAAGGGTTTCATGTGATCAGTGGGT  
GGACATGAGGCACATGATCCTAACCCGCCTAAGAAATCCGACCTATCGTACCGATGGGAC-----  
GTACGAAACAACTTA--ACTTTTTTTTTTT-----TTTTTCTCTC-----  
-----C AAAAAGAAAAAAA-----  
-----A-----ACT-TAACC-----  
-----TATAAC-GATGCACCA--CTGGGTC-  
AAGGCGAAAGGGAATCCGGTCTAATTCCGGAACCAGGCTGCGGCTACGTCCGATTGTCTATCAAACGATCT--  
AAACCCTCGTTTCGAAAAACTTTTCGGTTCGGTAACGCGACACAAACCCGAGAAGCTGTGAGAACCCCGGGAAGAGTTTTTC  
TTTTCTGCTTGAGGGACCGAGACCCGGAATTCGTCGCGGAGCGAGAGGGTTTTGGCACGACACGCTGGTAACAAGGCGAT  
CCCGAAGAGCGGCGGTTTCCGCGCCGTCGGTGGTCTCTCGACTGGCCCTTGAATAACCCGTTGGG-AGGGTTA-----  
-----CGTTTTTTTGG-----  
ACGTTGCGCCTGATCGTACCGATATCCGCATCAGGTCTCCTAGGTGAACAGCCTCTAGTCGATAGAAGAATGTAGGTAA  
Sida\_crystallina  
TTTAACGAGGACCTATTGGAGGGCAAGTCTGGTGCCAGCAGCCGCGGTAACCTCCAGCTCCAATAGCGTATATTAAGTTGTT  
GCGGTTAAAAGCTCGTAGTTGGATTCTGTCTTCGGCCGGGCGGTGCCG--CCCGATATCAAGGGC-----  
GTCGCACTGCCCTGGG-TCGGCGGTGTCAAAG-  
CCGTCGACTTTTAACGGTCGGACAATATCGCCGGAGTGGCGGCCGGTCTG-----GCGGT--C--T--A-----  
-----GCGGGGGCT-----  
-----CGCTCTC-----  
GCTTACCGTCCGGCTACCGCCGTAATCGTCCGGGTGCCCTTAACAAGGTGTCTCGGGCGGCCGGTAACGTTT-  
ACTTTGAACAAATTAAGTGTCAAAGCAGGT-GCATA-  
CCTCGCCTGAATATCGCAGCATGGAATGATGGAATAGGACCTCGGTCTTATTTTGTGTTTCTCT-----  
AGACCCGAGGTAA--X--  
CTCTTTCTTGATTCCGGTGGTGGTGGTGCATGGCCGTTCTTAGTTGGTGGAGCGATTTGTCTGGTTAATTCCGATAACGAAC  
GAGACTCTAGCCTGCTAAATAGGTGGCGGGTTTGTTTTCGCC-----  
GGTCAAACGGTGGAAAAA---TTTTT--GGGTT-----CGGCGTTCCCGGGATCAGGGCCG-----  
-CGGGCTTTTCGTTTTCGGGGGTGTG-----GCG-GCGGTCCGTCGT----  
CGGTGTCGGGGCAATTTCTTCTCA-----GGTCCGGC-----GCGG-  
TGTCGTTCTCGC-----CTCTGTTGCCGGGCGCTCGTCTCCCGCGGTTTCGCGTCTTCTCGGTCCTGACGA---  
-CT-  
CTTCTTAGAGGGACAAGCGGCGTTTAGCCGCGTGACAGTGAGCAATAACAGGTCTGTGATGCCCTTAGATGTCTGGGCCG  
ACGCGCGCTACACTGAAGGAATCAGCGTGTTTTTTCTCCCCCTGTCCGAAAGGACCGGGTA--XX--  
GTAAGCGGAGGAAAAGAACTAACAAGGATTCCTCAGTAGCGGCGAGCGAACAGGGATCAGTCCAGCACCGAACCCCGC--  
--GCTCC-GAAA--GGGCGCCGGGGAATGTGGTGTTCGGGAGGACCGTGCAGCTCTGTCCGGTA-  
TTGATCGCCCAAGTCTCCATGAACGGGGCTATCAACCCACAGAGGGTGTGAGCCCGTAGGCT--  
GGCGAGCCGAGACCGTGTACCGGTTCCCT---  
CCCAAGAGTCCGGTGTGCTGAGCGTGCAGCCCTAAGCGGGAGGTAAACTCCTTCTAAGGCTAAATATCGCCACGAGACCGAT  
AGCGAACAAGTACCGCGAGGAAAAGTTGAAAAGAATTTGAAGAGAGAGTTCAACAGTGCCTGAAACCGTTTCAGGGGGTTAA  
ACGGGTGAGCCCTCGAAGGTCGAA--GGGTCCCTCCTCCCG-----TCGCGCGTTCGACGCGCTCT---GC-----

-----TCCGGCGATC-----CGTAAAAAAGACGCCCGGCAGGGGAGAGTCGGCGAGCGCCG-----  
GCCGCAAGTGAGGGGCTCTTGTAGGACTCCGCAACCGGCTGGGTGC-----  
TCGGCAGAAGGGGGCGTCGGTAACGAGG-TCGCG---CGGGGGTTCGCTCCCG-----CGGCCG-----AGTCT-  
GGCGTC-----ACACCGGTCGATCGAT-CCCGGCCGTGTCTGTATCTCGCTG-----TCGGGAAAC-----  
TTCGTTC-----CAGTCAGA-----  
GAGCCAGTAGCGGAGAGTAAA-  
AAGTCGGGTCTCACCCGACCCGTCTTGAACACGGACCAAGGAGTCTAACATGTGCGCGAGTCGTCGAGTCG-  
ATAGCGAAACTCGCGA-GGCGCAATGAAAGTAAAGT---GTC--CCCGACGAG-----GGTGTTCGA-  
CGAGGGGAGATCCCGTCTCT--ATACA-----AACCGGAGCGGGCGCATCCCGCGGGCGTTCGAAG--CCGCGA-----  
-----  
CTCTAGTCGGCCGAACGAACCCGGAGCGCACACGTTGGGACCCGAAAGATGGTGACCTATGCCTGACCAGGACGAAGCCAGG  
GGAAACCCGTGGTGGAGTCCGCAGCGATTCTGACGTGCAAATCGATCGTCGGAGTTGGGTATAGGGGCGAAAGACTAATCGA  
ACCATCTAGTAGC--XXX--TGCCATATACCGGGCCCGGTCGGCAGTGCGAAA-CGTGAGCAG----  
GGCGCAGAGCCCGA--  
GTCACGCTGAGGCCCGGTGAGTAGGGGGTTCGCGACGGTGTGAGCGTTGAAGGGTGTGGGGCGGAGCCTGCCTGGAGCCGCC  
GTCGGTGCAGATCTTGGTGGTAGTAGCAAATACTCCAGAGGGATCCTGGAGGACTGACCGGAGAAGGGTTTCATGTGAACA  
GTGGTTGGACATGAGTCAGTCGATCCTAAGCCGCAGGAGAAATCCGTCCTAGTGTACAGGTGTGATCTAAAT---  
GTACGGAAAAAAGCAGCACGTTGATTCGAGACG-----GGGAGGTTTTAGTCGG-----  
-----TTGAAAAATCGACGA-----  
-----C-----GGC-CGTTAT-----  
CCTCGTCTCGATTTCTTCGATGTTGTTTTTTCTTCCTT-----CAATATAACAGAGGCACCG--CTGGGTC-  
AAGGCGAAAGGGAATCCGGTCCTAATCCGGAACCGAGCTGCGGCTACGTCCGATCG-----AAACGAACT--  
AAACCCTCGTTTTA-----T-  
CGTTCGCGTAACGCGACACAAACCGGAGAAGCTGTGAGAACCCCGGAAGAGTTTTCTTTCTGCTTGAGGGACCGAGAC  
CCTGGAAATCCGTTCGCGGAGCGAGAGGGTTACGGAT--  
GCACGCTGTTAAAAAGGCGATCCCGAAGAGCGGCGGTTTTCCGCGCCGTCCGTGGTTCGACTGGCCCTTAAAAATCC  
GGCGGG-AGGGTTA-----CGTTTTT-GG-----  
ACGCTCGCGCTCGTACCATCCGCATCAGGTCCTCCTAGGTGAACAGCCTCTAGTCGATAGACGAATGTAGGTAA  
Holopedium\_amazonicum  
TTTGACGAGGACCCATGGAGGGCAAGTCTGGTGCCAGCAGCCGCGTAACCTCCAGCTCCAATAGCGTATATTAAGTTGTT  
GCGGTTAAAAAGCTCGTAGTTGGATTCCGTCTTCGCGCCGGGCGGTGCGA---GGTCGACAA-GACCGC--AGC---  
ACTGCCTTTTGG-TTGCGGGGGTTAAAG-CCTGCTTCCTTTAAACGGTTCGGACAATACCGCCGGGGCGGC-----  
-G-----GCTCGC-----CGGGCAAC-----  
-----CGCGCGAGTCGC-----  
CGCG----  
TAATCGTCCGGGGTGTCTTCCACCGAGTGTCCCGGGCGGCCGGAATTTTTTACTTTGAACAAATTAGAGTGTCAAAGCAG  
GT-ACCCA---  
CACGCTGAATATCACAGCATGGAATGATAGAATAGGACCTCGGTCNNNNNNNNNNNNNNNNNNNNNNNNNNNNNNNNNNNN  
NNN--X--  
CTCTTTCTTGATTTCGGTGGGTGGTGGTGCATGGCCGTTCTTAGTTGGTGGAGCGATTTGTCTGGTTAATTCGATAACGAAC  
GAGACTCTAGCCTGCTAAATAGGTGGCGGGTTTACAAATGTTTGAG-----GGGAGTTCAG---  
CTTGGGGATCAGGAGTCG---GTTGGGGG-----GGGACGTCGCGTCGTT-----  
-----TGTCGCCCGTCA-----AAAG-----CGGG-----CCGGCGG-----  
C-----C-----GGTC-GTC-----TCTCTCTCG-----  
CCGGC--TCCCCTCTCGTCTGTCTC-TCCTCGCGTCCGTACAG-----  
CTCTTCTTAGAGGGACAAGCGCGTTTAGCCGCGTGACAGTGAGCAATAACAGGTCTGTGATGCCCTTAGATGTCTGGGCC  
GCACGCGCGCTACACTGAAGGAATCAGCGTGTTTTTTCTCCCTGTCCGAAAGGACCGGGTA--XX--  
GTAAGCGGAGGAAAAGAACTAAC TAGGATCCCCCAGTAGCGGCGAGCGAACAGGGAAGAGTCCAGCACCGAATCTCGC--  
--GTTGGGTTGAGCCGGCGCCGAGAAATGTGGTGTTCGGGAGGACCGCGCGCATCTGTCCGGTA-  
GTTAACGTCCAAGTCTTCATGAACGGGGCTATCAACCCACAGAGGTGTGAGGCCCGTAGGCT--  
GGCGTGCCGAGACCGTGCACCGGGTCCCTT---  
CCTAAGAGTCCGGTTGCTTGAGCGTGCAGCCCTAAGCGGGAGGTAACCTCCTTCTAAGGCTAAATATCGCCACGAGACCGAT  
AGCGAACAAGTACCGCGAGGGAAAGTTGAAAAGAACTTTGAAGAGAGAGTTCAATAGTGCCTGAAACCGTTACGGGGGTTAA  
ACGGGTGAGCCCTCGAAGGTCGAAAGG--CTCCCACTCCCGTCAG--CAGTCGGCGGCT-TCCGTCGACCGTG-----  
CGAT-CCGTCAAAAG-----ACGCCGTCGGCAGAG--CTCGCT-GCCGTACTAT---  
GACCGCAAGTTGGGGG--CCTAGTAGGACTCCGCAACCGGCTGGC-GC-----G---  
TCGTTATAAAGGGCG--GCGGTA-----ATCTGG-ATGGCTTGGG-----

CTCGCCTCTCGCCGTCGCGATCCGTCGT-----CTCCCGACGATCGT--GCCGGCCGTGTCTGTGCCGTT-----  
-----CA-----AACCCGGC-----  
A--TCGCAGCGGAGAGTAAAAA-  
GTCGGGTCTCACCCGACCCGTCTTGAAACACGGACCAAGGAGTCTAACATGTGCGCGAGTCGTGAGTATTA-  
AACGAAACTCGCGA-GGCGTAATGAAAGTAAAGTCCG-GCC---CTGATGAA-----GGTG--CTG-  
CGAGGGGAGATGCCGTCTCTATAC-----AAACCCGGAGCGGCCGCATCCCGCGGGCGTTTCAAG--CAGCGCACTT-----  
-----  
AGTCTGCCGAACGAACCCAGAGCGTACACGTTGGGACCCGAAAGATGGTGACCTATGCCTGACCAGGACGAAGCCAGGGGAA  
ACCCTGGTGGAGGTCCGCAGCGATTCTGACGTGCAAATCGATCGTCGGAGTTGGGTATAGGGGCGAAAGACTAATCGAACCN  
NCTAGTAGC--XXX--TGCCATACCCGGCCCGCGTCCGCAGTGCG-----ACGCG--T---TCGGTTTCTGAACC---  
GACGCGCTGAGGCCCGGTGAGTAGGGGGTTCGCGACGGTGAGCGTTGAAGGGTACTGGGCGCGAGCCTGCCCGGAGCCGCC  
GTCGGTGCAGATCTTGGTGGTAGTAGCAAATCTCCAGAGGGATCCTGGAGGACTGACGCGGAGAAGGGTTTCATGTGAACA  
GTGGTTGGACATGAGTCAGTCGATCCCTAAGCCGAGGAGAAATCCCTCCTAGCGTACAGGTGTGATCTGATAG-----  
---TTGACTGTGAGCGACTCGAGCGAAGC-----  
GAGAGGCGCGTTTTAAATTGAAATAAAATTTTTGCCCGTCCGGGCGACCGTCTCACGAGGCATAGGGTGTACG-----  
-----G-CGACAACATATTTTTTCAACCGCCCTTGTTCAAACTT-----  
-----CAATCTGGCCACCTCAC-AGTTCCTAT-----  
ATAATATAGAGGCACC--GCTGGGT--AAGGCGAAAGGGAATCTGGTCCTAATTCAGAACAGGCTGTGGCTACGTCCG-  
AT-----CGAAACGAATT--CAACCCTCGTTCAA-----TC--  
GGTCGCGGTAACGCGACACAAACCGGAGAAGCTGTGAGAACCCCGGGAAGAGTTTTCTTTCTGCTTGAGGGACCGAGACC  
CTGGAATCCGTCGCGGAGCGAGAGGGTTTTGGAT--  
ACGCGCTGTTAAAAAGGCGATCCCGAAGAGCGGCGCTTCCGCGCCGTCCTGGTGTCTCTGACTGGCCCTTGAAAAATCC  
GGCGGG-AGGGTTA-----CGTTTTTG-----  
ACGTTACGCGCTGCTCGTACCATATCCGCATCAGGTCTCCTAGGTGAACAGCCTCTAGTCGATAGACGAATGTAGGTAA  
*Leptodora kinditi*  
TTTAAACGAGGACCCATTGGAGGGCAAGTCTGGTGCCAGCAGCCGCGGTAACCTCCAGCTCCAAAAGCGTATATTAAGTTGTT  
GCGGTTAAAAAGCTCGTAGTTGGATTCCGTGCTTCCGGCCGGGCGGTGCCGCTGATAATCAAAGGGCGAT-CGC---  
ACTGCCCTGGGAGCGTTGGTGTCAAAG-CCGCGCTCTTTAACGGTCCGACAAATACCACCGGAGTGGTGTGTC-TGTTG-----  
-----TCTG-----GTTGGTT-----CGAGGTTT-----CGGCC-----  
-----TCTGTCTCAATCAGA-CG---GCGC---  
ACCCG----TAATCGTTCGAGGTGCCCTTAACCGGTGTCTCGAGCGGCCGGTAACGTTT-  
ACTTTGAACAAATTAGAGTGCTCAAAGCAGGT-  
GCATAAACTTCGCCGTAATATCACAGCATGGAATGATGGAATAGGACCTCGGTCTTATTTTGTGGTTT-TCTCT-----  
AGACCCGAGGTAA--X--  
CTCTTTCTTGATTCCGTGGGTGGTGGTGCATGGCCGTTCTTAGTGGTGGAGCGATTTGTCTGGTTAATTCGGATAACGAAC  
GAGACTCTAGCCTGCTAAATAGGTGGCGGGTTT-ATTCTA--AAA-----A-----  
TTGGGTTGGGTGTTTCGTCGGGATACGAGTTTCGTATCGACGAGTGTGGTGGTGT--TTGCAATGTTTGGC-AACG--  
GGAAGATG----GGAAGTTGCTGCGGTTCGTCGTCGCGGAGCTTGTCTGTCGGTGGCA-ACA-  
CCGGTGGTTAAGTTTTTTTCGGTTG--CTGCTGCTCGTA--GTTTCTTTCCTTT-TTCTTTTAGCT-----  
TTCGTTGTGTGCA--G-----CCCGCGCTCTAGGT--TCGA-  
TTCTTCGGCGGTTTCGCACCCCTTCTCGCGTCCGTACAA-----  
CTCTTCTTAGAGGGACAAGCGGCGTCCAGCCGCGTGACAGTGAGCAATAACAGGTCTGTGATGCCCTTAGATGTCTGGGCC  
GCACGCGCGCTACACTGAAGGAATCAGCGTGTTTTTCTCCCCGTCCGAAAGGACCGGGTA--XX--  
GTAAGCGGAGGAAAAGAACTAACTAGGATTCCTTAGTAGCGGCGAGCGAACAGGGAAAAGCCAGCACCGAATCTCGA--  
--GCTTGGTAAAGCGGGTTCAGAGAAATGGTGTTCGGGAGGACCGTGCCTCCGTCGGCA-T---  
TCGTCCAAGTCTTCATGAACGAGGCGAACAACCCATAGAGGGTGTGACGGCCGTAG-AC-  
AGCGGAGCCGCGACCGTGTATCGGGTCCCTT---  
CCCAAGAGTCGGGTTGCTTGGAGTGCAGCCCTAAGCGGGAGGTAACTCCTTCTAAGGCTAAATATCGCCACGAGACCGAT  
AGCGAACAAGTACC CGAGGGAAAGTTGAAAAGAACTTTGAAGAGAGAGTTCAAGAGTGCCTGAAACCGTTTCCAGGGGTTAA  
ACGGGTGGGCCCTCGAAGGTCGAA-CGTGTCCCCGCTCCCGTGT--TTTTGTCTGCGC--GTTCCG-ACTTGACTT--  
AGCGATCTCTATTCCGGAC-----GCGGTT-TTACTGTAACCTCGGTCCGCGAGCACT-----  
GCAAGTGGGGGA--CCTAGTAGGACTCCGCAACCGGCTGGGTGT-----G---  
CCGTCAAAGTGTGCTGTCAACT-----TGGCTTC--GAGAGATATTTTATG-----T-CTTTCGTT-----GCTGAGT-  
CCGGCT-----TCTACGGACGGTCT-GCCCCGCGGTGACCTGTATCGTGGCGG-----CGGTGCGCT-----  
TTTTCCGGAAG-----CACACAAGTCGT-----  
CGACCCAGAGCGGAGAGTAGAA--  
GTCGGGTCCCACCCGACCCGTCTTGAAACACGGACCAAGGAGTCTAACATGTGCGCGAGTCGTGAGTC-TA-

ATCGAAACTCGTGA-GGCGCAATGAAAGTAAAGTTTTTGGCC---CTGATGAA-----GGTG--CAA-  
CAAGGGGAGATCTCGTCTTTTTTTT-----CAAACCGAAGCGAGCGCATCCCCAGGGCGTTCGAAG--CCGCGACAT-----  
-----TT-----  
AGTCGGCCGAACGAACCTAGAGCGTACACGTTGGGACCCGAAAGATGGTGACCTATGCCTGGCCAGGACGAAGCCAGGGGAA  
ACCCTGGTGGAGGTCGCGACGGTGTGCGTTGAAGGGTACTGGGCGTGAGCCTGCCTGGAGCCGCCGTCGGTGCAGATCCTGGT  
TCTAGTAGC--XXX--  
TGCCATATACCGGGCCGTCGGTCCGCGAGTGAATATTCGTA CTCTCCCTCAGCGGGATTTATAATGAGACGCTTAGGCCCCGA  
CGAGTAGGGGGTTCGCGACGGTGTGCGTTGAAGGGTACTGGGCGTGAGCCTGCCTGGAGCCGCCGTCGGTGCAGATCCTGGT  
GGTAGTAGCAAATACTCCAGAGGGATCCTGGAGGACTGACGCGGAGAAGGGTTTCATGTGAACAGTGGTTGGACATGAGTCA  
GTCGATCCTAAGCCGAGGAGAAATCCGACCTAGTGTACTGGCGTGATTTCTA-----  
CTACATATCAAACCTTTCGATGCGTCTGTTGTTGTTTCTT-----TCTTTCTA-----  
-----GAAATAGATAGAGAGA-----  
AGCAACGATAGGC-----GAAGCGAAGGT-----AGTATA--  
-----TTCAATGATGCGCC-G-CTGGGTT-  
AAGGCGAAAGGGAATCCGGTCTTAATTCCGGAACCTGGCTGCGGCTACGTCCG-CG-----  
AAAAACGAAATTTAAACCCCTCGTT-TC-----  
TCTCGGTCGCGGTAACGCGACACAAACCGGAGAAGCTGTGCGAGAACCCCGGGAAGAGTTTTCTTTTCTGCTTGAGGGACCGA  
GACCATGGAATTCGTCGTTGGAGCGATATGGTTTTGGAT--  
ACACGCTGTTAAAAAGGCGATCCCGAAGAGCGCCGCTTCTGCGGCGTCCGTGGTCTGCTCGACTGGCCCTTGAAAAATCC  
GGCGGG-AGGGTTA-----CGTTTTTGG-----  
ACGTTGCGGCCAGCTCGTACCGATATCCGCATCAGGTCTCCTAGGTGAACAGCCTCTAGTCGATAGATGAATGTAGGTAA  
Podon\_leuckarti  
TTTAACGAGGATCCATTGGAGGGCAAGTCTGGTGCCAGCAGCCGCGGTAACCTCCAGCTCCAATAGCGTATATTAAGTTGTT  
GCGGTTAAAAAGCTCGTAGTTGGATTTCTGT-TTCGGCCGGGCGGTGCCGCTGATAATCAA-GGGCG---CGC---  
ACTGCCCTTGGGAGCGTTGGTGTCAAAG-CCGCGCTCTTTTAACGGTCCGACAAATACCACCGGAGAGGTG---ACGG-----  
-----GCTG---GCGGGT-----TG-GGTCT-----GGCTTTCACTGTCA-GT---TCCC--  
ACCCG----TAATCGTCCGAGGTGCTCTTAACCGAGTGTCTCGGGCGGCCGTAACGTTT-  
ACTTTGAACAAATTAGAGTGTCTAAAGCAGGT-GATT-----  
TTCGCTGAATATCACAGCATGGAATGATGGAATAGGACCTCGGTCTTATTTTGTGGTTTT-TCT-----  
AGACCCGAGGTAA--X--  
CTCTTTCTTGATTCCGTTGGTGGTGGTGCATGGCCGTTCTTAGTTGGTGGAGCGATTTGTCTGGTTAATTCCGATAACGAAC  
GAGACTCTAGCCTGCTAAATAGGTGGCGGATTT-AAAATTTT-TAAA-----C-----  
TTGGGTTCCGAGTTCGTCGGGATCAGGGCCG-----GCGTT-----G-TCTCGTCCCG-GCTG--AGCTC-  
-----GTTTCGCGCTGTGGCGTAG-----GGGAAAG-TTG-GAGGCGG-----TTTCGG--  
---CCGCTTTTTGGC--AATTTTCTGC---GTTGCTGTGTGT-----GGCGGGTGAGGTC--G-----  
AAGGCGTGGATGGCG-TTGGT--TCCC GGCGGTCCGCTTCGTTCTCGCTCCGTCACAA-----  
TTCTTCTTAGAGGACAAGCGGCGTCCAGCCGCTGACAGTGAGCAATAACAGGTCTGTGATGCCCTTAGATGTCTGGGCC  
GCACGCGCGCTACACTGAAGGAATCAGCGTGTTCCTTCTCCCTGTCTGAAAAGACCGGGTA--XX--  
GTAAGCGGAGGAAAAGAACTAACTAGGATTCCTTAGTAGCGGCGAGCGAACAGGGAAGAGCCAGCACCGAACCTCGC--  
--GCTTGGTTAAGCGGGTGCAGAGGAATGTGGTGTTAGGGAGGACCGTGCAGCTGTCTCCGGCA-  
TTTATCGTCCAAGTCTTCATGAACGGGGCATT--ACCCACAGAGGGTGTGAGCCCGTAG-GC-  
TGCGGAGCCGCGACCGTGTATCGGGTCTCTT---  
CCCAAGAGTCCGATTGCTTGAGCGTGCAGTCCTAAGCGGGAGGTAAACTCCTTCTAAGGCTAAATATCGCCACGAGACCGAT  
AGCGAACAAGTACCCGAGGGAAAGTTGAAAAGAACTTTGAAGAGAGAGTTCAATAGTGCGTGAAACCGTTTCCAGGGGGTTAA  
ACGGGTGAGCCCTCGAAGGTGCGAAAAGTGTCCCGCTCCCGT-----TGTCGACTGTC--GGACAT-TTCTGCCG--  
TCTGATCTCT-TTCGGGAG-----ACGGAGTGGTGTGTG--TTTCTCGGCGGTCCG--  
GGCTGCAAGTGGGGGA--CCTAGTAGACTCCGCGACCGACTGGGTGT-----G---  
CTGTTATAAGGAACTCTGATTTT-----CAGCGA---GTTTGTGGGGCTTGCC---TTCGCTTCTT-----GTTGTGT-  
GCGGAG-----TCTCTGAGCAGTCTT-GCCCGTCTGTACCTGTCTTTC-GCCCG-----TACCT-----  
TCGTG--G-----TA---ACGTCCGT-----GAACC-  
AGAGCGGAGAGTAGAA--  
GTCGGGTCTCACCCGACCCGCTTTGAAACACGGACCAAGGAGTCTAACATGTGCGCGAGTCTGCGAGTCACA-  
ATCGAAACTCGTGA-GGCGCAATGAAAGTAAAACA---GCC---CTGATGAA-----GGTGTCTG-  
TAAGGGAAGATCTCGTCTTTTATTTTTTTTACAAACCGAAGCGAGCGCATTTCCAGGGCGTTCGAAG--CCGCGAC-T-----  
-----T-----  
AGTCGGCCGAACGAACCTAGAGCGTACACGTTGGGACCCGAAAGATGGTGACCTATGCCTGGCCAGGACGAAGCCAGGGGAA



ACCTGGTGGAGGTCCTCGCAGCGATTCTGACGTGCAAATCGATCGTCGGAGTTGGGTATAGGGGCGAAAGACTAATCGAACCA  
TCTAGTAGC--XXX--TGCCTATACCGGGCCGTCGGTCGGCAGTGTGAT---ACGCCCTCCTCTTGAAGAAAAGAGAC---  
GAGGCGCTGAGGCCCGACGAGTAGGGGGTTCGCGACGGTGTGAGCGTTGAAGGGTTATGGGCGGAGCCTGCCGAGCCGCC  
GTCGGTGCAGATCTTGGTGGTAGTAGCAAATACTCCAGAGGGATCCTGGAGGACTGACGCGGAGAAGGGTTTCATGTGAACA  
GTGGTTGGACATGAGTCAGTCGATCCTAAGCCGCAGGAGAAATCCGACCTAGTGTACTGGCGTGATTCTTT--T-----  
TTGTCAGTGAGTGTGTGAATATATATAT-----TTTTTATA-----  
-----TATATGTACGCA-----  
-----CAC-----TTTACAACAA-----AATATT-----  
-----ATCA--GAGGCGCC-G-CTTGGTT-  
AAGGCGAAAGGGAATCCGGTCCTAATCCGGAACCAGGCTGTGGCTACGTCCGACG-----AAATACGAATT---  
AACCTCGTT-T-----  
TCTCGGTGCGGTAACGCGACACAAACCGAAGAAGCTGTGAGAACCCCGGAAGAGTTTTCTTTCTGCTTGAGGGACCGA  
GACCTGGAATTCGTCGTGGAGCGAGAGGGTTTTGGAT--  
ACACGCTGGTAAAAAGGCGATCCCGAAGAGCCCGCGTTTTCTGCGGGTCCGTGGTCTTCTCGACTGGCCCTTGAAAATTC  
GGTGGG-AGGGTTA-----CGTTTTTGG-----  
ACGTTACGCTGCTCGTACCAGATATCCGCATCAGGTCTCCTAGGTGAACAGCCTCTAGTCGATAGATGAATGTAGGTAA  
Evadne\_nordmanni  
TTTAACGAGGATCTATTGGAGGGCAAGTCTGGTGCCAGCAGCCGCGGTAACCTCCAGCTCCAATAGCGTATATTAAGTTGTT  
GCGGTTAAAAAGCTCGTAGTTGGATTTCTGTCTTCGCGCCGGGCGGTGCCGCTGATAATCAA-GGGCG---CGC---  
ACTGCTTTGGGAGCGTTGGTGTCAAAG-CCGCGCTCTTTAACGGTCGACAATACCACCGGAGTGGTG-----ACGG-----  
-----GTCG-----GCGGGT-----TG-GCTTT-----TA--T-----  
-----CGGCCTTCACTGTCG-GC---TCCC---  
ACCCG---TAATCGTCCGAGGTGCTCTTAACCGAGTGTCTCGGGCGGCCGGTAACGTTT-  
ACTTTGAACAAATTAGAGTGTCAAAGCAGGT-GCTTG---  
CTCGCTGAATATCACAGCATGGAATGATGGAATAGGACCTCGGTCTTATTTTGTGGTTTT-TCTCT-----  
AGACCCGAGGTAA--X--  
CTCTTTCTTGATTTCGGTGGGTGGTGCATGGCCGTTCTTAGTTGGTGGAGCGATTTGTCTGGTTAATCCGATAACGAAC  
GAGACTCTAGCCTGCTAAATAGGTGGCGGGTTT-TATCATT-GAAT----T-----  
TTGGGTTTCGGAGTTTCGCGGGATCAGAGTTG-----GCGTT-----GCTCTCTGTCTC-GTCG--AGG---  
-----CGTGTGGGGAGTGA-----GGTGTGCG-TTG-CCCTGGG-----TTTCGG--  
---CT-CCGGGTGGC---GGTGTTTTGG---TTCCCT-----T-----CGCGTTAGGCCG--G-----  
GCGGAGTG--TGGCG-TTGGC--TCCCCGGCGGTCCGCTTCTGCTTCTCGCGTCCGTCACAA-----  
CTCTTCTTAGAGGGACAAGCGGCGTCCAGCCGCTGACAGTGAGCAATAACAGGTCTGTGATGCCCTTAGATGTCTGGGCC  
GCACGCGCGCTACACTGAAGGAATCAGCGTGTTTTCTCCCCCTGTCCGAAAGGACCGGGTA--XX--  
GTAAGCGGAGGAAAAGAACTAACTAGGATTCCTYAGTAGCGGCGAGCGAACAGGGAAGAGCCAGCACCGAACCTCGC--  
--GCTTGT--GACGGGTGCAGAGGAATGTGGTGTAGGGAGGACCGTGCCTGTCTGTCGGTA-  
TTTATCGTCCAAGTCTCCATGAACGGGGCGATCAACCCAAAGAGGGTGTGAGCCCGTAG-GC-  
TGACGAGCCGCGACCGTGTATCGGGTCCCT---  
CCCAAGAGTCCGGTTGCTTGAGCGTGCAGCCCTAAGCGGGAGGTAACTCCTTCTAAGGCTAAATATCGCCACGAGACCGAT  
AGCGAACAAGTACCGCGAGGGAAAGTTGAAAAGAATTTGAAGAGAGAGTTCAATAGTGCCTGAAACCGTTTCAGGGGGTTAA  
ACGGGTGAGCCCTCGAAGGTGCAACAGTGTCCCCGCTCCCGT-----TGTGCAGTCGTC--TGGC---CTGTGTTTC--  
GCCGATCTCT-TTACGGGG-----ACGGTGGCTCGCGGTG--CTTATAGGCCGGCTGCC-----  
GGCTGCAAGTGGGGGA--CCTAGTAGGACTCCGCGACCGACTGGGTGT-----G---  
CTGTTATAAGGGACTTGGATTTCT-----CGGTGTC--GAGAGTTGCGGCTTGCCG-TTCTTTCTTC-----ACCGCT-  
GCCGAG-----TTTCCGAGCAGTCC-TGCCGGTCTGACCTGTGAGTCTGCCG-----TGCTCCTTT-----A-  
TTGAA--G-----CA---ACGTCGGT-----  
GGACCCAGAGCGGAGAGTAGAA--  
GTCGGGTCTCACCCGACCGTCTTGAACACGGACCAAGGAGTCTAACATGTGCGGAGTCTGTCAGTCAACA-  
ATCGAAACTCGTGA-GGCGYAATGAAAGTGAACA---GCC---CTGATGAA-----GGTGTCTG-  
TGAGGGAAGATCTCGTCTTTTTTT-----CAAACCGAAGCGAGCGCATCCCCGGGGCGTTGCAAG--CCGCGAC-T-----  
-----T-----  
AGTCCGGCCGGACGAACCCAGAGCGTACACGTTGGGACCCGAAAGATGGTGACCTATGCCGAGGACGAAGCCAGGGGAA  
ACCTGGTGGAGGTCCTCGCAGCGATTCTGACGTGCAAATCGATCGTCGGAGTTGGGTATAGGGGCGAAAGACTAATCGAACCA  
TCTAGTAGC--XXX--TGCCTATACCGGGCCGTCGGTCGGCAGTGTGAT---ACATC-TCCCTCTCGAAGAGAGAGCA---  
GAGGTGCTGAGGCCCGACGAGTAGGGGGTTCGCGACGGTGTGAGCGTTGAAGGGTTATGGGCGGAGCCTGCCCGAGCCGCC  
GTCGGTGCAGATCTTGGTGGTAGTAGCAAATACTCCAGAGGGATCCTGGAGGACTGACGCGGAGAAGGGTTTCATGTGAACA  
GTGGTTGGACATGAGTCAGTCGATCCTAAGCCGCAGGAGAAATCCGACCTAGTG-AATGGCGTGAT--T-----T-

ATTAAAAAAGACTCGTTGTGGCCTAT-----CGGCCGCG-----  
-----ACGATGAAT-----  
-----T-----TTTATA-----T-----  
-----ATCA--GAGGCGCTTG-CTTGTT-  
AAGGCGAAAGGGAATCCGGTCTAATTCCGGAACCAGGCTGTGGCTACGTCCGACG-----ACAACGAATT---  
AACCTCGTT-T-----  
TCTCGGTTCGCGGTAACGCGACACAAACCGAAGAAGCTGTTCGAGAACCCCGGGAAGAGTTTTCTTTCTGCTTGAGGGACCGA  
GACCTGGAATTCGTCGTGGAGCGAGAGGGTTTTGGAT--  
ACACGCTGTTAAAAAGGCGATCCCGAAGAGCGCCGCTTCCGCGGCGTCCGTGGTTCGACTGGCCCTGAAAAATC  
GGTGGG-AGGGTTA-----CGTTTTTGG-----  
ACGTTACAGCCTGCTCGTACCAGATATCCGCATCAGGTCTCCTAGGTGAACAGCCTCTAGTCGATAGATGAATGTAGGTAA  
Bythotrepes\_longimanus  
TTTAACGAGGACCTATTGGAGGGCAAGTCTGGTGCCAGCAGCCGCGGTAACCTCCAGCTCCAATAGCGTATATTAAGTTGTT  
GCGGTTAAAAAGCTCGTAGTTGGATTCCGTGTCTTCGCGCCGGGCGGTGCCGCTGATAATCAA-GGGCGAT-CGC---  
ACTGCCCTGGGAGCGTTGGTGTCAAAG-CCGCGCTCTTTTAACGGTCGGACAATACCACCGGAGTGCGC---GGTG-----  
-----ATAG---GT--CGT-----CT-CCTCT-----CG--C---  
-----GGGGAGGCGGTCGAA-GA---ACC---  
GCCCC---TAATCGTCCGAGGTGCCTTTAACCAGGTTCTCGGGCGGCGGTAACGTTT-  
ACTTTGAACAAATTAGAGTGTCAAAGCAAGT-GCATA-  
CTTCGCCTGAATATCACAGCATGGAATGATGGAATAGGACCTCGGTCTATTTTGTGTTT-TCTCT-----  
AGACCCGAGGTAA--X--  
CTCTTTCTTGATTTCGGTGGTGGTGCATGGCCGTTCTTAGTTGGTGGAGCGATTTGTCTGGTTAATTCCGATAACGAAC  
GAGACTCTAGCCTGCTAAATAGGTGGCGGGTTT-TATTA--AAA-----T-----  
TTGGGTTCCGAGTTCGCCGGGACCAGGGTGT-T-----GTGTC-G-----GTGGGCCGTGTC-ACGG--GGTCT-  
-----CGGGAGACGGGGGTGTTT-----GAATGGG-ATG-CTTGGCGGC-----TTTCGGG-  
---CCGTCTGTGTC--TTAATTCGGACC-TCACATCCGGGC-----CTTTGATTCCGGTG--G-----  
CGCGGTCCGTCCG---TCGGCGTCCCCGGCGTTTCGCTTCGTTCTCGCTCCGTCACAA-----  
CTCTTCTTAGAGGACAAGCGGCTCCAGCCGCTGACAGTGAACAATAACAGGTCTGTGATGCCCTTAGATGTCTGGGCC  
GCACGCGCTACACTGAAGGAATCAGCGTGTTTTTCTCCCTGTCCGAAAGGACCGGGTA--XX--  
GTAAGCGGAGAAAAGAACTAACAAGGATTCCTCAGTAGCCGCGAGCGAAGAGGAAAGAGTCCAGCACCGAACCTCGC--  
--GCTTGGTAAAGCGGGCGCCGAGGAATGTGGTGTTCGGGAGGGCGTGCAGCTGTCCGGTA-TT-  
ATCGTCCAAGTCTTCATGAACGAGGCGAGCAACCCACAGAGGGTGTAGGCCCCGTAG-GC-  
TGACGAGCCGAGACCGTGTACCGGGTCTTT---  
CCCAAGAGTCCGGTTGCTTGAGCGTGCAGCCCTAAGCGGGAGGTAAACTCCTTCTAAGGCTAAATATCGCCACGAGACCGAT  
AGCGAACAAGTACCGCGAGGGAAAGTTGAAAAGAACTTTGAAGAGAGAGTTCAAGAGTGCCTGAAACCGTTCCAGGGGTTAA  
ACGGGTGGGCCCTCGAAGGTCGAAACGTGTCCCGCTCCCGC-----TACGTGGAGGCC--GGGCGC-TTGTGATG---  
GCCGATC-CG-TAAAAAAG-----ACGGCTGTCTTGGCG-  
TTTAACCAGGCGCCCTCCACGGCCGTAAGTGGGGGA--CCTAGTAGGACTCCGCGACCGACTGGGTGTTT-----  
---TG---CTGTTATAAGGGGCGCCGATTTACAATG-CAGCGC--  
GGGCGAGAGGCTTCTGTCTCTTCGTCTTGTGTTGCAGAGT-GCGGCG-----TTTCCGAACAGTCCT-  
GCCGGTCTGTACCTGTAATCC-GCCCG-----CGCGACTTT-----AATCGGTACG-----CG---  
ACGTCGGC-----GGACCCAGAGCGGAGAGTAGAA--  
GTCGGGTCCCACCCGACCCGCTTTGAAACACGGACCAAGGAGTCTAACATGTGCGCGAGTCTGCGAGTCACA-  
ATCGAAACTCGTGA-GGCGCAATGAAAGTGAAGCA---GCC---CTGATGAA-----GGTGTCTG-  
TGCGGGAAGATCTCTACTTTTTTT-----CAAACCGGAGAGCGCATTTCCCGGGCGTTTCAAG--CCGCGAC-T-----  
-----TT-----  
AGTCGGCCGAACGGACCCAGAGCGTACACGTTGGGACCCGAAAGATGGTGACCTATGCCTGGCCAGGACGAAGCCAGGGGAA  
ACCCTGGTGGAGTCCGCGAGCGATTCTGACGTGCAAATCGATCGTCGGAGTTGGGTATAGGGGCGAAAGACTAATCGAACCA  
TCTAGTAGC--XXX--TGCCATACCGGGCCCGCGTCCGCGAGTGTATACAAACGTATTCTTCTCGAAGAGAGATAA---  
GAAACGCTGAGGCCCGGCGAGTAGGGGGTTCGCGACGGTGTGAGCGTTGAAGGGTTGTGGGCGTGGCCGAGCCGCC  
GTCGGTGCAGATCTTGGTGGTAGTAGCAAATACTCCAGAGGGATCCTGGAGGACTGACGCGGAGAAGGGTTTCATGTGAACA  
GTGGTTGGACATGAGTCAATCCTAAGCCGAGGAGAAATCCGACCTAGTGTACTGGCGTGATTTT-----  
TATTATTTTATTGTACGTATCTATGT-----CATGTA-----  
-----GAGACGTATAA-----  
-----GA-----AAAATAAAAA-----ATTTCT-----  
-----AAAAA-GAGGCGCC-G-CTGGGTG-  
AAGGCGAAAGGGAATCCGGTCTAATTCCGGAACCAGGCTGCGGCTACGTCCG-CG-----AATAACGAATT---

AACCCCTCGTT-T-----  
TCTCGGTTCGCGGTAACGCGACACAAACCGGAGAAGCTGTCGAGAACCCCGGGAAGAGTTTTCTTTTCTGCTTGAGGGACCGA  
GACCATGGAATTCGCTCGTGGAGCGAGATGGTTTTGGAT--  
ACACGCTGTTAAAAAGGCGATCCCGAAGAGCGCCGCTTTCTGCGGCGTCCGTGGTCTGCTCGACTGGCCCTTGAAAATCC  
GGCGGG-AGGGTTA-----CGTTTTTG-----  
ACGTTTCGCGCCTGCTCGTACCGATATCCGCATCAGGTCTCCTAGGTGAACAGCCTCTAGTCGATAGAAGAATGTAGGTAA  
Polyphemous\_pediculus  
TTTAACGAGGACCCATTGGAGGGCAAGTCTGGTGCCAGCAGCCGCGGTAECTCCAGCTCCAATAGCGTATATTAAGTTGTT  
GCGGTTAAAAAGCTCGTAGTTGGATTTTCAGTTTTTCGGCCGGGC--CCCTTCCCGTTCAAATACGGGCGGT-GAA---  
GGGGCTTTGGATCGTCCGTGTCAAAG-CCGCGGTCTTTTAACGGTCCGACTATACCACCGGAGTGGGATT-GGTCGT----  
-----ATCT-----GCGCTCT-----TTCGTTTC-----GCGGT-----  
-----CGGGTGCAGTTTAC-GG---  
TCGCCCCGATT-----TTACTGACTGGGGTGCCTTTAACCAGGTGTCCAGCCAGCCGTTACGTTT-  
ACTTTGAACAAATTAGAGTGCTCAAAGCAGGT-GCAT---  
TTTCGCCTGAATATCACAGCATGGAATGATGGAATAGGACCTCGGTCTTATTCTGTTGGTTTT-TTC-T-----  
AGACCCGAGGTCA--X--  
CTCTTTCTTGATTCCGTGGGTGGTGGTGCATGGCCGTTCTTAGTTGGTGGAGCGATTTGCTGGTTAATTCGGATAACGAAC  
GAGACTTAGCCTGCTAAATAGGTGGCTGGTTTT-TTATTAT-CGAA-----A-----  
GATTTTTGGGTTTTCTCGGCGGTCCGGAGCCT-----GGGTC-----G-GCTGTTTGGG-GGGC--GGTTG---  
-----TTCGGCGTCCCGGT-----GGCG-GTG-GCGGGTG-----CGGG---  
--GGGCAACTCT--GTGTCCGTCG-----CTTTTGGTC-----TGTGCGTCCGGCG--G-----  
CCGCTTTCCGGGCGGTCCGC-TCCTCGGCTGTTCCGG--ATTCTCGCTCAGTCACAT-----  
ATCTTCTTAGAGGGACAAGCGGCGTCCAGCCGCTGACAGTGAGCAATAACAGGTCTGTGATGCCCTTAGATGTCCTGGGCC  
GCACGCGCGCTACACTGAAGGAATCAGCGTGTTTACTTCCCCCTGTCCGAAAGGACCGGGTA--XX--  
GTAAGCGGAGGAAAAGAACTAACAAGGATTCCCCTAGTAGCGGCGAGCGAACAGGGAAAGTCCAGCACCGAACCTCGT--  
--GCTCGTC--ATCGGGTACCGAGGAATGTTGTTTGGGAAGGCCGTGCGCGTCTGTCCGGTT-T-----  
CGTCCAAGTCCCTATGAACAAGGCCCTT-ACCCACAGAGGGTGTAGGCCCGTAG-GC-  
TGGCGTGCCGCGACCGTGTATTGGGTCTTTT---  
CCCCAGAGTCCGGTTGCTTGAGCGTGCAGCCCTAAGCGGGAGGTAAACTCCTTCTAAGACTAAATATTGCCACGAGACCGAT  
ACGGAACAAGTACCGGAGGGAAAGTTGAAAAGAACTTTGAAGAGAGAGTTCAAGAGTGCCTGAAACCGTTTTATGGGGTTAA  
ACGGGTGGGCCCTCGAAGGTCGAAACGCGTCCCCGCTCTAGTG----TGTCGTACGGTT--GGAC---TTTTGGTGC--  
GGCGATCTTTAACCGGACG-----TTCGTGCCGAGAGGCT-CCCGCCCTGCGACTGCT-----  
TCTAGTGGGGG--CCTAGTAGGACTCCGCGACCGACTGGGTGT-----G---  
CTGTTATAAGGGGTGCCGGCGTC-----TCTT--CTGTGTTTCGATTTCCG----TCGGATCGGTTGA-GTACGGT-  
GCTTTT-----TTGCCGAACAGTCTT-GCCCGGTGCTGACCTGTCTTCT--GCGG-----CGCGT-----  
GCTCG-----CACG-TCGTCTGC-----  
GGACCCAGAGCGGAGAGTAGAT--  
GTCGGGTCCCACCCGACCGTCTTGAAACACGGACCAAGGAGTCTAACATGTAAGCGAGTCGTCGAGTCGTT-  
TATGAACTTGAGA-GGCGCAATGAAAGTAAAGCA---GCC---CCGATGAG-----GGTGTCTG-  
CGAGGGATGATCCCGTCTTTTTTTT-----TAAACCGAAGCGGGCGAGTCCAGGGCGTGCGAAG--CCGCGACAT-----  
-----TG-----  
AGTCGGCCGTACGAACCCAGAGCTTACACGTTGGGACCCGAAAGATGGTGACCTATGCCCTGGCCAGGACGAAGCCAGGGGAA  
ACCTGGTGGAGGTCGCGAGCGATTCTGACGTGCAAATCGATCGTCCGAGTTGG-  
TATAGGGGCGAAAGACTAATCGAACCATCTAGTAGC--XXX--TGCCATACCGGGCCCGCGCCGCGCAGTGAA-----  
ACGTACTTTTCTCGGAGAGAGATGT---  
AAGACGTGAGCCCCGCGAGTAGGGGGTCCGACCGGTGCGCGTTGAAGGGTTGTGGGCGTGAGCCTGCCGAGCCGCC  
GTCGGTGCAGATCTTGGTGGTAGTAGCAAATACTCCAGAGGGATCCTGGAGGACTGACGCGGAGAAGGGTTTTCATGTGAACA  
GTGGTTGGACATGAGTCAGTCGATCCTAAGCCGAGGAGAAATCCGTCTCAGTT-AACGCGTGTATTTATA----  
TGATTATATAAAAACGATGTGTTTTTTTTTTTTTTTTTTTTTTTTTTTTTTTCTTTTCTTTTCCGGATTGATTTCTGGATT-----  
-----GAGAGGGAGAGAGAGAGAGA-----  
GAGAGCGTGTGT-----TTTTGTAATTT-----TTAATT-----  
-----ACAAACGAAGCGCC-G-CTGGGTC-  
AAGGCGAAAGGGAATCCGGTTCTAATTCGGGAACCAAGCTGCGGCTACGTCCG--T-----ACAAACGATTA-----  
ACTCGAT-TA-----TAT-  
GGTCGCGGTAACGCGAAACAAGCCAGAGAAGCTGCCGAGAGCCCCGGGAAGAGTTTTCTTTTCTGCTTGAGGGACCGAGACC  
CTGGAATTCGCTCGTGGAGCGAGAGGGTTTTGGAT--  
ACACGCTGGTAAAAAGGCGATCCCGAAGAGCTGCGGTTTTCTGCGGCGTCCGTGGTCTGCTCGGCTGGCCCTTGAAAATCT

GGTGGG-AGGGTTA-----CGTTTTTGG-----  
ATGCTCGCGCTTGTCTGTACCGATATCCGCATCAGGTCTCCTAGGTGAACAGCCTCTAGTCGATAGAAGAATGTAGGTAA  
    Cercopagis\_pengoii  
TTTAACGAGGACCTATTGGAGGGCAAGTCTGGTGCCAGCAGCCGCGGTAAGTCCAGCTCCAATAGCGTATATTAAGTTGTT  
GCGGTTAAAAAGCTCGTAGTTGGATTCTCTGTCTTCGCGCCGGGCGGTGCCGCCGATAATCAA-GGGCG-T-CGC---  
ACTGCCCTTGGGAGCGTTGGTGTCAAAG-CCGCGCTCTTTTAACGGTCGGACAATACCACCGGAGTGGCG-----GGGG-----  
-----ATAG-----G---CGT-----CG-GCTCT-----CG--C-----  
-----AGTTCGRCG-CCGAA-GG---ACC---  
GCCCG----TAATCGTCCGAGGTGCCTTTAACCAGGTGTCTCGGGCGCCGTTAACGTTT-  
ACTTTGAACAAATTAGAGTGTCAAAGCAGGT-GCATAAC-  
CTTCGCCGTAATATCACAGCATGGAATGATGGAATAGGACCTCGGTCTTATTTGTTGGTTT-TCTCT-----  
AGACCCGAGGTAA--X--  
CTCTTTCTTGATTTCGGTGGGTGGTGGTGTCATGGCCGTTCTTAGTTGGTGGAGCGATTTGTCTGGTTAATTCGGATAACGAAC  
GAGACTCTAGCCTGCTAAATAGGTGGCGGGT-TATTAA--AAAA---T---  
TTGGGTTTCGGGTTCTGTCGGGACCAGGTGTCT-----GTCTCAG-----GCGTTCTTTGTC-CGCC--GGTGC-  
-----TTKTTTCTGCCGGCCGCC-----GGTTGCG-GGG-CGAGGCG-----TTTCGG--  
----CGTCCGCTCT--GTTTCTTCGG----TGGTCTGTGGGT-----GGGCGGT-CGGTG--G-----  
CTTGGTTTCGTCGGGGGCCGCGCTCCCCGGCGTTCGCCCGTTCCTCGCGTCCGTCACAA-----  
CTCTTCTTAGAGGACAAGCGCGTCCAGCCGCTGACAGTGAGCAATAACAGGTCTGTGATGCCCTTAGATGTCTGGGCC  
GCACGCGCTACACTGAAGGAATCAGCGTGTTTTATCCCCGTGCCGAAAGGACCGGTA--XX--  
GTAAGCGGAGGAAAAGAACTAACAAGGATCCCTCAGTAGCGGCGAGCGAACAGGGAAGAGTCCAGCACCGAACCTCGC--  
--GCTTGGTTAAGCGGGCGCCGAGGAATGTTGGTGTTCGGGAGGACCGTGCCTCTGTCCGGTA-T--  
ATCGTCCAAGTCTTCATGAACGAGGCGAGCAACCCACAGAGGGTGTCAAGCCCCGTAG-GC-  
TGACGAGCCGAGACCCTGTACCGGGTCTTT---  
CCCAGAGTTCGGGTTGCTTGAGCGTGCAGCCCTAAGCGGGAGGTAACTCTTCTAAGGCTAAATATCGCCACGAGACCGAT  
AGCGAACAAGTACCOCGAGGGAAAGTTGAAAAGAACTTTGAAGAGAGAGTTCAAGAGTGCCTGAAACCGTTCAGGGGTTAA  
ACGGGTGGGCCCTCGAAGTGCAAACGTGTCCTCCCGTCCCGC-----TACGTGGAGGCC--GGACGC-TAGTGGCG---  
ACCGATC-CG-TCAAAAAG-----  
ACGGTCCGCTCTGCGCTTTTCCGGCGCTCTCCACGGGCTGCAAGTGGGGGA--  
CCTAGTAGGACTCCGCGACCAGCTGGGCG-----G---CTGTTATAAGGGGCGCCGATTTACGAAG---  
GCGGG--TATTGTTGGGCTTCGGTC-CTCCGTCCTCGT-----CCGAGT-GCGGCG-----CTTCCGAGCAGTCT-  
GCCGCGTCTGACCTGTCTATCC-GCCCG-----CGCGACTTT---A--CGGT-CG-----CG---  
ACGTCGGC-----GGACCCAGAGCGGAGAGTAGAA--  
GTCGGGTCCCACCCGACCCGCTCTTGAACACGGACCAAGGAGTCTAACATGTGCGGAGTCTGTCGAGTCAAT-  
AACGAACTCGTGA-GGCGCAATGAAAGTGAAGCA---GCC---CTGAAGAA-----GGTGTTCGT-  
TACGGGAAGATCTCTTCTTTT-----CAAACCGGAGAGCGCATTTCCCGGGCGTTCGAAG--CCGCGAC-T-----  
-----T-----  
AGTCGGCCGAACGAACCTAGAGCGTACACGTTGGGACCCGAAAGATGGTGACCTATGCCTGGCCAGGACGAAGCCAGGGGAA  
ACCTGGTGGAGTCCGCAGCGATTCTGACGTGCAAATCGATCGTGGAGTTGGGTATAGGGGCGAAAGACTAATCGAACCA  
TCTAGTAGC--XXX--TGCCATACCGGGCCCGCGTCCGCGAGTGTACA---ACGTATTCCTCCTCGAAGAGAGGCA----  
GAGACGCTGAGGCCCGCGAGTAGGGGGGTGCGGGCGGTGAGCGTTGAAGGGTTGTGGGCGTGAAGCCTGCCCGGAGCCGCC  
GTCGGTGCAGATCTTGGTGGTAGTAGCAAATACTCCAGAGGGATCCTGGAGGACTGACGCGGAGAGGGTTTCATGTGAACA  
GTGGTTGGACATGAGTCAGTCGATCCTAAGCCGAGGAGAAATCCGACCTAGTGTACTGGCGTGAATTTATACGTTCGACAG  
TGTGTACGGTGTGTGTGTGTGTGTGTGTGTGTGTGCTTGC CGGAGAGCGTACGTACG-----  
-----GGGGCATAATATTTCA-----  
CATTATACATCGT-----CATACGAGAC-----ATATTT---  
-----ATCAA-GAGGCGCC-G-CTGGGTG-  
AAGGCGAAAGGGAATCCGGTCCTAATCCGGAACCAGGCTGCGGCTACGTCCG-CG-----AAATACGAATT---  
AACCCTCGTT-T-----  
TCTCGGTGCGGCAACGCGACACAAACCAGGAGAGCTGTGAGAAACCCGGAAGAGTTTTCTTTTCTGCTTGAGGGACCGA  
GACCATGGAATTCCTGTCGTGGAGCGAGATGGTTTTGGAT--  
ACACGCTGTTAAAAAGGCGATCCCCGAAGAGCGCCGCTTCTGCGGCGTCCGTTGGTCTCTCGACTGGCCCTTGAAAAATCC  
GGCGGG-AGGGTTA-----CGTTTTTGG-----  
ACGTTTCGCGCTGCTCGTACCGATATCCGCATCAGGTCTCCTAGGTGAACAGCCTCTAGTCGATAGAAGAATGTAGGTAA  
    Cyclestheria\_hislopi  
TTTAACGAGGACCTATTGGAGGGCAAGTCTGGTGCCAGCAGCCGCGGTAAGTCCAGCTCCAATAGCGTATATTAAGTTGTT  
GCGGTTAAAAAGCTCGTAGTTGGATTCTGTGT-CTCGGCGGGGTGGTGCCT--TGGCCAAATCGGTTTCGA--CGC---

ACTGCCTTGAAAATTCANTTTTCGTA-----CGCCGGACAGATTGCCGGGTGGAG-GCGAAAGAGGGAT---GCGGA-----  
-----ATCG-----GGGCAAC-----YC-GGTTT-----CG--T-----  
-----ACTTTCT-TTTTT-CG---TCC---TC---  
-----TTGCTCGGGGTGCTCTTAACCGGGTGTCCCAGTGACCGGC-ACGTTT-  
ACTTTGAACAAATTAGAGTGTCTCAAAGCAGGTTACATA---  
CACGCCTGAATATAACAGCATGGAATGATGGAATAGGACCTCGGTCTTATTTTGTGTTTTATTCTT-----  
AGACCAGAGGTAA--X--  
CTCTTTCTTGATTTCGGTGGGTGGTGGTGCATGGCCGTTCTTAGTGGTGGAGCGATTTGTCTGGTTAATTCCGATAACGAAC  
GAGACTCTAACCTGCTAAATAGGTGGCGGGTTG-GTGATGG-GGAA----C----  
TGGGGTGTTCGGGGAAAGGGGGTAGGGCGCGA---GGTTCGGGCY-----CG-AGTTTTTGGG-GGTT--GTCCT-  
-----C-AACCTTGCTTACGTTTCT-----TTCTGATCTTTCACG-GGG-TCAGGAA-----GGGG-  
---CTGGGGCAGGGG--GAAAGGGCAG-----CTCTCGGGCT-----CGGGATTCCCTC--G-----  
TCGTTTCTCCTCC---TCAAC-TTTTCCGGCATCTCCC-  
CTTCCGCCCGTCCGTACAAACAAACTCTTCTTAGAGGGACAAGCGGCGTCCAGCCGCGTGACAGTGAGCAATAACAGGTCT  
GTGATGCCCTTAGATGTCTGGGCCGCACGCGCTACACTGAAGGAACCAGCGTGTCTCAAACCTCCCTGTCCGAGAGGACC  
GGGTA--XX--  
GTAAGCGGAGGAAAAGAACTAACAAGGATTCCCTCAGTAGCGGCGAGCGAACAGGGAAAGAGCCCAGCACCGAACCTCGCTT  
CAGGATCTCCGATCTGGGGCCGAGGAATGTGGTGTGGGAGGACCATGACCGCCTGTCCGGCT-T---  
TCGTCCAAGTCTCCATGAACGGGGCGAGCAACCATAGAGGGTGTGAGCCCGTGGTAT-  
TGGCGAGTCGCGACCGTGGTAGAGTCTCT-----  
CCTTGGAGTCCGGTGTGTTGAGAGTGCAGCTCTAAGCGGGAGGTAAACTCCTTCTAAGGCTAAATACGGCCACGAGACCGAT  
AGCGAACAAAGTACCAGCGAGGGAAAGTTGAAAAGAACTTTGAAAGAGAGATTCAAGAGTGCCTGAAACCGTTTGGAGGGTAAA  
ACGGGTGGGCGCTCGAAGATCGAA-CG-ATCCTTACTCCCGCCAT-  
CTGCACGCCAGTCTTGTAGATCCTAACGTGTGCCACGTTTACCGGATGTGTGTTTTGCCACGGGTCTTGCAGGAG--  
TTCACTGGCGGCCGTGCAGGGGCCGAAGTTGGGA--TCTAGTAGGACTCCGCAACCCTCTGGAT-----  
--AG--ACGTCAAACGGGAACCTTCTTGA---G-TATTCCA--CGGCTTGTCTGTTCCGTTTCCGGCGTTAACTT---  
CAAGCGG-GGAGTG-----TTTCTGACGTTCTA-GTCCGGACGTTATCACCTGTTT-CGAGA-----TGTGG-AAA---  
-A--GAATTTT-----CTTTTCCAC-----  
GTCCCAACAGCGGAGAGTAGAATAGTCCGTTCCACCCGACCCGCTTGAACACGGACCAAGGAGTCTAACATGTGCGCGA  
GCTTTCGGGTC-AA-  
GTTAAACCTTGCGAAGGCGAAATGAAAGTGAATACTGGCCGAGGTAGATGAAATGCTCCTCGTTTTGCCGAGGGAGGATCCC  
GTCCTCCATC-----GT-GAGGATCGGGCGCACTCCCGGGCGTCTGACG-TCCGCGTT-----  
-----  
GACGGTCTGACGAACCAAGAGCGCACACGTTGGGACCCGAAAGATGGTGCCTATGCCCTGGCCAGGACGAAGCCAGGGGAAA  
CCCTGGTGGAGGTCCGCGAGCGATTCTGACGTGCAAATCGATCGTCCGAGTTGGGTATAGGGGGCGAAAGACTAATCGAACCAT  
CTAGTAGC--XXX--TGCCATATACCGGACCACCGGAGATTACAAAA-GGCAGAGCTATCATCTTGCCTTTTAAACGA--  
AAGATGCTTATGCCCGGTGAGTAGGGGGTTCGCGATGGTGTGCCTAGAAGGGTC-  
TGGGCGGAGCCTGCCCGGAGCCACCATCGGTGCAGATCTTGGTGGTAGTAGCAAATACTCCAGAGGGATCCTGGAGGACTG  
ACGCGGAGAAGGGTTTCATGTGAACAGTGGTTGGACATGAGTCAGTCGATCCTAAGCCGCGAGGAAATCCGTCCCAGCG--  
-----T-----TG-AACGGCGTGTCTCTCTC-----  
-----AAA-----  
-----TCGAGGCGCC-G-  
CTGGGTTTAAAGGCGAAAGGGAATCCGGTTCTGATTCCGGAACCGAGCGTCCGACACGTTCC-----AAGATCCTGTG--  
CAA--GCAGGA-T-----TTT--  
GTCGCGGTAACCGGAACCGGAGATGCTGTCCGGAACCCCGGGAAGAGTTTCTTTTCTGCTTGAGGAGCCGAAACCC  
TGGAAGTCTGTCTGTTGGGCGATAGGGTTGTGG-----TT-----  
CTCCGAAGAGCGCCGCTTTCCGCGGCGTCCGTGG--GTTCTCGACCGGCCCTTGAATAATCCGG-GGG-  
AGGGACATAAAGTAAACAAACAAAAACGTTATTACGAATATAAAGTTTCGCGCTTGGTCTGATACCATAACCGCATCAGGTCTC  
CTAGGTGAACAGCCTCTAGTCGATAGATGAATGTAGGTAA  
Caenestheriella\_setosa  
TTTAAACGAGGACCTATTGGAGGGCAAGTCTGGTGCAGCAGCCGCGGTAACCTCCAGCTCCAATAGCGTATATTAAGTTGTT  
GCGGTTAAAAAGCTCGTAGTTGGATTCCGGT-CGCGGTCGGGCGGTGCC-----GCCATCTGG---TGA--TGC---  
ACTGCCTAGG-----CCGGACAATCAGCCGACTG-----  
-----  
-----TCCGGGGTGTCTTAACCGGGTGTCTGGGTGGCCGGT-ACGTTT-

ACTTTGAACAAATTAGAGTGTCTCAAAGCAGGT-GCAT-----  
TGCGCCTGAATATCACAGCATGGAATGATGGAATAGGACCTCGGTCTTATTTTGTGGTTT---TCT-----  
GGACCCGAGGTAA--X--  
CTCTTTCTTGATTTCGGTGGGTGGTGGTGCATGGCCGTTCTTAGTTGGTGGAGCGATTTGTCTGGTTAATTCCGATAACGAAC  
GAGACTCTAGCCTGCTAAATAGGTGGCGGGTC-----  
-----  
-----CTACCCGTCCTCCGTCAC-----  
TCTTCTTAGAGGGACAAGCGGCGTCCAGCCGCATGACAGTGCAGCAATAACAGGTCTGTGATGCCCTTAGATGTCTGGGCCG  
CACGCGCGCTACACTGAAGGAATCAGCGTGTCT-----CTCCCTGTCCGAGAGGACCGGGTA--XX--  
CTAAGCGGAGGAAAAGAACTAACAAGGATTCCTTAGTAGCGGCGAGCGAAGAGGGAAAAGCCAGCACCGAACCTCGC--  
----ACCCCG-----GGTGTGCGGAATGTGGTGTTCAGGAGGACCGTGCCTGTCTGTCGGG-T-A---  
TCGTCCAAGTCTCCATGAATGGGGCCAGCAACCCAGAGAGGGTGTTCAGGCCCGTGG-----  
GACGAGCCGCGACCGTGTATTGGGTCTCT----  
CCTTAGAGTTCGGGTTGCTTGAGAGTGCAGCCCTAAGCGGGAGGTAAACTCCTTCTAAGGCTAAATACGGCCACGAGACCGAT  
AGCGAACAAAGTACCGCGAGGGAAAGTTGAAAAGAATTTGAAGAGAGAGTTCAATAGTGCCTGAAACCGTTTCAGGGGGTTAA  
ACGGGTGGGCCCTCGAAGGTCGAA-CG-CCCCTACTCCTGTTC--TGTTCGCGTGGCA-CGTGCTGCTTTT-----  
CGATCTCGTACGAG-----ACGGAGCTTGGTGGCG--TATGCC--TGGAC-  
TGCAGGGGCCGCTAGTTAGGGG--GCCAGTAGGACTCCGCAACCGGCTGGGTTTTA-----AG---  
TCGTGAGAAGGTTCTGGAGGAA----G-CCTCCTC--TGGGGGTGAAATCCGGGATTCGGGGCGATCT---TC--CCG-  
GCCGTG-----AACCAGAAATCCCCC-GTCTGGCGTCTGGGACGAGTTC-TGGCA-----ACAGG-ACT----G--  
TCGGTTC-----TGGGCGTCACCGT-----  
GGGGACACCCGCGGAGAGTAGA---  
GTCGGGTCCCACCCGACCCGTTCTTGAACACGGACCAAGGAGTCTAACATGTGCGCGAGTCGTCCGGTA-CT-ACTAAACC-  
--CGAAGGCGCAATGAAAGTGAAGACTGTGC-----CTCGTCCGCG-  
GTCTAGGGGAGATCCCGTTCTGCTTC-----G--GTAGTCCGGCGCATCCCCGGGGCGTCAAG---CCGCGTT-----  
-----  
GCCGGCTAGACGAACCAAGAGCGTACAGCTTGGGACCCGAAAGATGGTACCTATGCCTGGCCAGGACGAAGCCAGGGGAAA  
CCCTGGTGGAGGTCCGCGAGCATCTCTGACGTGCAAAATCGATCGTCCGAGTTGGGTATAGGGGCGAAAGACTAATCGAACCAT  
CTAGTAGC--XXX--TGCCATATACCGGGCCGCTGGTG-----GCAGAGCA--CGTCTCCC-TGCAGAAGGG--  
AGTACGCTTAGGCCCCAGCGAGTAGGGGGGTGCGAGCGGTGCGCGCAGAAGGGTC-  
TGGGCGTGAGCCTGCCTGGAGCCGCGCTGGTGCAGATCTTGGTGGTAGTAGCAAATACTCCAGAGGGATCCTGGAGGACTG  
ACGCGGAGAAGGGTTTCATGTGAACAGTGGTTGGACATGAGTCAGTCGATCCTAAGCCGAGGTGAAATCCGTCCCAGGG--  
-----AACGGCGTGTCTTTCTTTCT-----  
TTTTTC-----AAAGGAA-----  
-----ATGT-----  
-----TACAAGCGCC-G-  
CTGGGT--AAGCGAAAGGAATCCGGTCTAATTCGGAACCCGGTTACGGATACGATC-----GAGTGCCCGT---  
CA-----CTC--  
GTCACGGCAACGTGAAAAAGCCCGGAGAAGCTGTCCGGAGCCCCGGGAAGAGTTTTCTTTCTGTCATGAGGGGCCGAAACCC  
TGGAATTCTGTGCTGGAGCGATAGGGTATTGG-----  
CCCCGAAGAGCGCCGAGTTCTGCGGCGTCCGTGG--GTTCT--GGCTGGCCCTTGAAAAATCCGG-GTG-AGGGCTA-----  
--CGCGATTGT-----  
TTCGTACCCGCTCGTACCGATATCCGCATCAGGTCTCCCAGGTGAACAGCCTCTAGTCGATAGATGAATGTAGGTAA  
Limnadia\_sp  
TTTAACGAGGACCTATTGGAGGGCAAGTCTGGTGCCAGCAGCCGCGGTAACTCCAGCTCCAATAGCGTATATTAAGTTGTT  
GCGGTTAAAAAGCTCGTAGTTGGATTCCGGT-CGCGGCCGGTGGTGCC-----GCCTCATGG---TG---CGC---  
ACTGCCTAGG-----CCGACAATCAGCCGACTA-----  
-----  
-----TCCGGGTGCTCTTAACCGGTGTCTGGGTGGCCGGT-ACGTTT-  
ACTTTGAACAAATTAGAGTGTCTCAAAGCAGGT-GCAT-----  
TGCGCCTGAATATCACAGCATGGAATGATGGAATAGGACCTCGGTCTTATTTTGTGGTTT---TCT-----  
GGACCCGAGGTAA--X--  
CTCTTTCTTGATTTCGGTGGGTGGTGGTGCATGGCCGTTCTTAGTTGGTGGAGCGATTTGTCTGGTTAATTCCGATAACGAAC  
GAGACTCTAGCCTGCTAAATAGGTGGCGGGTC-----

```

-----
-----
-----
-----CTACCCGTCCGTAC-----
TCTTCTTAGAGGGACAAGCGGCTCCAGCCGCATGACAGTGAGCAATAACAGGTCTGTGATGCCCTTAGATGTCCTGGGCCG
CACGCGCGCTACACTGAAGGAATCAGCGTGTC-----CTCCCTGTCCGAAAGGACCGGGTA--XX--
CTAAGCGGAGGAAAAGAACTAACAAGGATTCCCNATAGTAGCGGCGAGCGAAGAGGGAAAAGCCCAGCACCGAACCTCGC--
----ACTTC-G----GGTGTGCGGGAATGTGGTGTTCAGGAGGACCGTGC GCGTCTGTCCGG-T-A---
TCGTCCAAGTCTCCATGAATGGGGCCAGCAACCCAGAGAGGGTGTGACGGCCCGTGG-----
GACGAGCCCGACCGTGTATTGGGTCTCT----
CCTTAGAGTCGGGTTGCTTGAGAGTGCAGCCCTAAGCGGGAGGTAAACTCCTTCTAAGGCTAAATACGGCCACGAGACCGAT
AGCAAACAAGTACCGAGGGAAAGTTGAAAAGAACTTTGAAGAGAGAGTTCAAGAGTGC GTGAAACCGTTTCAGGGGGTTAA
ACGGGTGGGCCCTCGAAGGTCGAA-CG-GTCCCACTCCCGTCAC-TCGTAGGCCGGTC-CGCGCCG-TCTT-----
CGAT-TCCTTATGGA-----ACGG----TGGTGCG---TTTGC----GGTT-
TACGGGGGCCGCTAGCTGGGGA--CCCAGTAGGACTCCGCAACCGGTTGGGC--AG-----GG---
CCGTCAGAAGGGTTCTGGAGGAA----G-GTTCCTT--TGGAGGTGGATTCCGGGATTCCGGGCGGTCC---TC--TCG-
ACCGTG-----AACCAAATTTCTCCC-----TT-----
-----TCACGGG-----GTAGAATGCGCGGAGAGTAGA---
GTCGGGTCCCACCCGACCCGCTTGAACACGGACCAAGGAGTCTAACATGTACGCGAGTCGTCGGGTA-CT-ACTAAACC-
--CGAAGGCGCAATGAAAGTGAAGGCCG-C-----TTCGTTGGCG-
GCCGAGGGGAGATCCCGTTCTGTTCC-----G--GTAGCTCGGGCGCATCCCCGGGGCGTCAAG---CCGCGTT-----
-----
GCCGGCTAGACGAACCAAGAGCGTACACGTTGGGACCCGAAAGATGGTGACCTATGCCTGGCCAGGACGAAGCCAGGGGAAA
CCCTGGTGGAGGTCCGCAGCGATTCTGACGTGCAAATCGATCGTCTGAGTTGGGTATAGGGGCGAAAGACTAATCGAACCAT
CTAGTAGC--XXX--TGCCATACCGGGCCGTTGGTG-----GCAGAGCA--CGCCTCGC--TTAGTGTGCG--
AGTGCGCTGAGGCCCAACGAGTAGGGGGTTCGCAGCGGTGCGCGCAGAAGGGTC-
TGGGCGTGAGCCTGCCTGGAGCCCGCTGGTGCAGATCTTGGTGGTAGTAGCAAATACTCCAGAGGGATCCTGGAGGACTG
ACGCGGAGAAGGGTTTCATGTGAACAGTGGTTGGACATGAGTCAGTCGACCCTAAGCCGAGGTGAAATCCGTTCCAGAG--
-----AACGGCGTGTCTTTCT-----
TTCACT-----AGAAGAA-----
-----ATGTG-----
-----TTGAAGCGCC-G-
CTGGGT--AAGGCGAAAGGGAATCCGGTTCTAATTCCGGAACCCGGTCAATGGATGCGATC-----AAGTGCCCGT---
CA-----CTT--
GTCACGGTAACGTGAAAAAGCCCGGAGAAGCTGTCTGGAACCCCGGGAAGAGTTTCTTTTCTGCATGAGGGACCGAAACCC
TGGAATTCTGTGCTGGAGCGATAGGGTATTGG-----
TCCCGAAGAGCGCCGAGTTCTGCGGCGTCCGTGG--GTTTC-AGCCGGCCCTTGAAAATCCGG-GTG-AGGGCTA-----
-----CGCGATTGT-----
TTCATACCGGCTCGTACCGATAACCGCATCAGGTCTCCAGGTGAACAGCCTCTAGTCGATAGATGAATGTAGGTAA

```

```

;
End;
begin paup;
delete 7 10 17 19;
exclude 125-161 221-418 494-507 560-576 589-593 705-1020 1033-1042 1184-1189 1269-
1287 1334-1341 1396-1401 1622-1768 1789-2043 2054-2059 2126-2135 2164-2201 2260-
2311 2482-2488 2511-2558 2768-3104 3156-3202 3401-3435 3442-3455;
end;

```

[!Likelihood settings from best-fit model (TrN+I+G) selected by hLRT in Modeltest Version 3.06]

```

BEGIN PAUP;
Lset Base=(0.2450 0.2319 0.3060) Nst=6 Rmat=(1.0000 2.9304 1.0000 1.0000
6.0059) Rates=gamma Shape=0.6790 Pinvar=0.5407;
END;

```

```
[begin mrbayes;  
set autoclose=yes;  
Lset basefreq= estimate Nst=6 revmat= estimate Rates=invgamma Shape=estimate  
covarion=yes;  
mcmc ngen=100000 printfreq=1000 samplefreq=10 nchains=4 savebrlens = yes  
startingtree=random;  
END;]
```

For Morphometrics file see Treebase.org S839.

For Structure files in DCSE format (readable by DCSE, Wordpad and BBedit) see hotlink at [www.buffalo.edu/~djtaylor/publications.htm](http://www.buffalo.edu/~djtaylor/publications.htm).
